1 **Systems-wide dissection of organic acid assimilation in *Pseudomonas aeruginosa* reveals a**  
2 **novel path to underground metabolism**

3 Stephen K. Dolan<sup>1</sup>□, Andre Wijaya<sup>2</sup>, Michael Kohlstedt<sup>3</sup>, Lars Gläser<sup>3</sup>, Paul Brear<sup>4</sup>, Rafael  
4 Silva-Rocha<sup>5</sup>, Christoph Wittmann<sup>3</sup> and Martin Welch<sup>4</sup>□

5 <sup>1</sup>School of Biological Sciences, Georgia Institute of Technology, Atlanta, GA 30332;

6 Emory–Children’s Cystic Fibrosis Center, Atlanta, GA 30322;

7 Center for Microbial Dynamics and Infection, Georgia Institute of Technology, Atlanta, GA

8 30332.

9 <sup>2</sup>Centre for Targeted Protein Degradation, University of Dundee, Dow Street, Dundee, DD1

10 5EH, Scotland, United Kingdom

11 <sup>3</sup>Institute of Systems Biotechnology, Saarland University, Saarbrücken, Germany

12 <sup>4</sup>Department of Biochemistry, University of Cambridge, United Kingdom

13 <sup>5</sup>Faculdade de Medicina de Ribeirão Preto, Universidade de São Paulo, Brazil

14 □ Authors to whom correspondence should be addressed. MW ([mw240@cam.ac.uk](mailto:mw240@cam.ac.uk)), SKD

15 ([sdolan31@gatech.edu](mailto:sdolan31@gatech.edu))

16

17 Running title: **The *P. aeruginosa* 2-methylcitrate cycle**

18

19 Keywords: ***Pseudomonas aeruginosa*, enzyme promiscuity, 2-methylcitrate cycle, central**

20 **metabolism, propionate metabolism, underground metabolism**

21

22

23 **Abstract**

24 The human pathogen *Pseudomonas aeruginosa* (Pa) is one of the most frequent and severe  
25 causes of nosocomial infection. This organism is also a major cause of airway infections in  
26 people with cystic fibrosis (CF). Pa is known to have a remarkable metabolic plasticity,  
27 allowing it to thrive in diverse environmental conditions and ecological niches, yet little is  
28 known about the central metabolic pathways which sustain its growth during infection, or  
29 precisely how these pathways operate. In this work, we used a combination of ‘omics  
30 approaches (transcriptomics, proteomics, metabolomics and <sup>13</sup>C-fluxomics) and reverse  
31 genetics to provide a systems-level insight into how the infection-relevant organic acids,  
32 succinate and propionate, are metabolized by Pa. Moreover, through structural and kinetic  
33 analysis of the 2-methylcitrate synthase (PrpC) and its paralogue, citrate synthase (GltA), we  
34 show how these two crucial enzymatic steps are interconnected in Pa organic acid  
35 assimilation. We found that Pa can rapidly adapt to the loss of GltA function by acquiring  
36 mutations in a transcriptional repressor, which then de-represses *prpC* expression. Our  
37 findings provide a clear example of how ‘underground metabolism’, facilitated by enzyme  
38 substrate promiscuity, “rewires” Pa metabolism, allowing it to overcome the loss of a crucial  
39 enzyme. This pathogen-specific knowledge is critical for the advancement of a model-driven  
40 framework to target bacterial central metabolism.

41

42

43

44

45

46

## 47 **Introduction**

48 *Pseudomonas aeruginosa* (Pa) is a notorious opportunistic human pathogen that  
49 frequently infects the airways of people with cystic fibrosis (pwCF). Pa is also well known for  
50 being metabolically flexible. This flexibility is important because nutrient acquisition and  
51 assimilation during infection scenarios is likely to be complex and dynamic process. Indeed,  
52 there is an increasing realisation that the enzymes of metabolism may also serve as targets  
53 for the next generation of antimicrobial therapies (1). However, we currently lack a clear  
54 understanding of how core metabolism operates in Pa.

55 Laboratory strains of Pa are known to prefer C4-dicarboxylates such as malate,  
56 fumarate and succinate as carbon and energy sources during growth *in vitro* (2). However,  
57 for reasons that are not yet clear, during infection, Pa frequently uses less-favoured carbon  
58 sources for growth, including the host-derived airway surfactant, phosphatidylcholine (PC).  
59 This phospholipid is broken down by secreted Pa phospholipases to yield phosphorylcholine,  
60 glycerol, and long-chain fatty acids (3, 4).

61 Pa can also metabolize short chain fatty acids. Propionate is a naturally-occurring  
62 short-chain fatty acid produced by the human gut microbiota, and is a commonly used food  
63 preservative with potent bacteriostatic activity. Another rich source of propionate are the  
64 anaerobes that frequently occupy in the lower airways of pwCF. These anaerobes break  
65 down tracheobronchial mucin to produce copious quantities of propionate. However, and in  
66 spite of its known growth-inhibitory properties against some species of bacteria, Pa is able  
67 to thrive on propionate, and can very effectively utilise the compound as a sole carbon  
68 source *in vitro* (5–7). Pa does this by catabolising propionate through the 2-methylcitrate  
69 cycle (2MCC) (**Figure 1A**) to yield succinate and pyruvate, which feed directly into the TCA

70 cycle. The 2MCC also sits at an important junction in amino acid catabolism, since several  
71 amino acids (L-valine, L-isoleucine, L-methionine, and L-threonine) are degraded to  
72 propionyl-CoA, which must then be oxidised by this pathway (7). Given the ubiquity of  
73 propionate in many host niches, it comes as little surprise that a functional 2MCC is required  
74 for infection by a plethora of human pathogens, including *Mycobacterium tuberculosis*,  
75 *Neisseria meningitides* and *Aspergillus fumigatus* and *Talaromyces marneffe* (8–12). The Pa  
76 2MCC has also been shown to be important for infection of the nematode intestine (13).

77 We currently have a limited understanding of how Pa metabolises propionate, or  
78 how the 2MCC interfaces with the other components of central carbon metabolism in this  
79 organism. Although some features of the pathway can be extrapolated from a knowledge of  
80 the biochemistry in other bacteria (such as *Escherichia coli* and *Salmonella enterica*) these  
81 are fundamentally dissimilar microbes with alternative operonic arrangements for the 2MCC  
82 ORFs, and very different metabolic architectures compared with Pa (14, 15). For example,  
83 propionate metabolism in several *Enterobacteriales* (including *E. coli* and *S. enterica*) and all  
84 analysed *Xanthomonadales* is coordinated by a Fis family transcription factor (TF) known as  
85 PrpR (16). By contrast, the 2MCC in *Gammaproteobacteria* is typically controlled by a GntR  
86 family TF. Remarkably, no 2MCC regulators from the GntR family have been experimentally  
87 characterised to date. Therefore, and to understand better how Pa utilizes propionate, we  
88 used a combination of ‘omics approaches (transcriptomics, proteomics, metabolomics and  
89 <sup>13</sup>C-fluxomics) and reverse genetics to provide a systems-level insight into how the organic  
90 acids, succinate and propionate, are metabolized by Pa. Moreover, through structural and  
91 kinetic analysis of the 2-methylcitrate synthase (PrpC), and its paralogue citrate synthase  
92 (GltA), we show how these two crucial steps are interconnected in organic acid assimilation.  
93 Building on these observations, we found that Pa can rapidly adapt to the loss of GltA by

94 acquiring mutations that de-repress expression of the *prpC*-encoding 2MCC operon (*prp*).  
95 These mutations are in a GntR-family TF, which we show encodes a transcriptional repressor  
96 of the *prp* operon. Our findings provide a clear example of how ‘underground metabolism’  
97 (17), facilitated by enzyme promiscuity, allows Pa to overcome the loss of a crucial enzyme  
98 in central carbon metabolism.

## 99 **Results**

### 100 **‘Omics-driven examination of Pa grown on succinate and propionate as sole carbon** 101 **sources.**

102 To understand how growth on different substrates affects the physiology of Pa, we  
103 first examined the proteome during exponential phase growth on succinate or on  
104 propionate as a sole carbon source. Through the proteomic analysis, we identified and  
105 quantified 3796 proteins. Of these, 265 proteins showed increased abundance during  
106 growth on propionate, and 295 proteins showed increased abundance during growth on  
107 succinate ( $q$ -value  $\leq 0.05$ ,  $\log_2$  fold-change  $\geq 1$  or  $\leq -1$ ; **File S1**). To obtain a global overview of  
108 the physiological changes, we used the Proteomaps web service (18) to generate Voronoi  
109 tessellations (19) structured around the KEGG orthologies of the statistically significant  
110 changes ( $p$ -value  $\leq 0.01$ ,  $\log_2$  fold change  $\geq 1$  or  $\leq -1$ ). As shown in **Figure 1B**, most of the  
111 proteomic changes were associated with ‘central carbon metabolism’, ‘biosynthesis’,  
112 ‘signalling and cellular process’ and ‘energy metabolism’. Notably, growth on propionate led  
113 to a strong induction (ca. 16-fold change (FC)) of all proteins encoded by the *prp* operon,  
114 including the GntR-family 2MCC operon regulator, PA0797, which we designate here as PrpR  
115 (**Figure S1A-D, File 1A**).

116 To provide a complementary insight into the absolute metabolic fluxes in Pa during  
117 growth on propionate and succinate, we also carried out a [<sup>13</sup>C] fluxome analysis. This was  
118 achieved by measuring the mass isotopomer distributions in proteinogenic amino acids and  
119 cell carbohydrates using three separate tracers for propionate and succinate (*Materials and*  
120 *Methods*) (20). The calculated relative fluxes for Pa strain PAO1 grown on labelled  
121 propionate or succinate are shown in **Figure 2**. The corresponding quantitative comparison  
122 of NADPH (redox) supply and ATP (energy) supply for succinate- and propionate-grown Pa  
123 are shown in **Figure S2**.

124 Comparison of the flux maps, in combination with the proteomic data, generated an  
125 unparalleled insight into the central carbon metabolic networks of Pa during growth on both  
126 substrates. For example, several of the key proteomic alterations found when comparing  
127 growth on propionate with growth on succinate were in core central carbon metabolism  
128 (**File S1A**). These core changes were largely consistent with the corresponding carbon flux  
129 distributions (**Figure 2**). In general, the expression of enzymes from the pentose phosphate  
130 pathway (PPP), the Embden-Meyerhof-Parnas pathway (EMPP) and the Entner-Doudoroff  
131 pathway (EDP) was decreased during growth in propionate compared with succinate. The  
132 expression of several enzymes in the TCA cycle were increased during growth on  
133 propionate, including citrate synthase GltA (2.5 FC), aconitase AcnA (2.3 FC) and the  
134 isocitrate dehydrogenases ICD (2.5 FC) and IDH (1.7 FC). A corresponding increase in TCA  
135 cycle carbon flux was also evident, with roughly an 11% increase in flux through the  
136 reactions between citrate (CIT) and malate (MAL) (**Figure 2**). Fumarate efflux (2%) was also  
137 detected during Pa growth using succinate as a sole carbon source.

138           Among the largest discrepancies between the propionate- and succinate-grown  
139 cultures at both the proteome and fluxome level were noted at the reactions involved in the  
140 pyruvate shunt. Expression of the malic enzyme, MaeB, which catalyses the oxidative  
141 decarboxylation of malate to produce pyruvate and CO<sub>2</sub>, was down-regulated (-4.7 FC)  
142 during growth on propionate. By contrast, the pyruvate carboxylase-encoding proteins,  
143 *pycA* (PA5435) and *pycB* (PA5436), which catalyse the ATP-dependent carboxylation of  
144 pyruvate to yield oxaloacetate, were up-regulated (2.6 FC), as was the regulator, PycR (21,  
145 22). These alterations matched the corresponding flux data, which revealed a substantial  
146 decrease in flux from malate to pyruvate (-87%) and an increase in the flux from pyruvate to  
147 oxaloacetate (OAA) (54%) during growth on propionate. There is a good metabolic logic to  
148 this. Although the catabolism of propionate yields succinate and pyruvate, an early enzyme  
149 in the propionate catabolic pathway (PrpC) requires oxaloacetate as a substrate (**Figure 1**).  
150 Therefore, we hypothesised that this drain on the oxaloacetate pool may be countered by a  
151 combination of lower malic enzyme-mediated pyruvate generation and increased  
152 anaplerotic pyruvate carboxylase activity to sustain the TCA cycle. In support of this,  
153 mutants defective in pyruvate carboxylase (encoded by *pycA* and *pycB*) were unable to grow  
154 on propionate as a sole carbon source (**Figure S1E**). Growth on propionate also increased  
155 the expression (5.1 FC) of the membrane-bound malate-quinone oxidoreductase, MqoB,  
156 which generates oxaloacetate directly from malate. A corresponding 98% increase in carbon  
157 flux from malate to oxaloacetate was evident during growth on propionate (**Figure 2**).

158           The expression level of phosphoenolpyruvate synthase (PPS) and pyruvate kinase  
159 showed no significant differences between the growth conditions. However, the fluxomic  
160 analysis captured a pronounced alteration in carbon flow at this node. During growth on  
161 succinate, the net carbon flux was in the pyruvate → phosphoenolpyruvate (gluconeogenic)

162 direction, with phosphoenolpyruvate originating from pyruvate mainly *via* the combined  
163 activity of malic enzyme (MAE) and PEP synthase at the equivalent cost of 2 ATP (PYR + H<sub>2</sub>O  
164 + ATP → PEP + AMP + P<sub>i</sub>). By contrast, during growth on propionate, the net flux at this node  
165 was in the direction phosphoenolpyruvate → pyruvate; a reaction that is catalyzed by  
166 pyruvate kinase isozyme A (PykA) and that generates ATP (23). In this scenario,  
167 phosphoenolpyruvate largely originates from the action of phosphoenolpyruvate  
168 carboxykinase (PckA) on the oxaloacetate that is generated *via* the activity of malate-  
169 quinone oxidoreductase (MqoB). Interestingly, and despite the greatly increased flux from  
170 oxaloacetate → phosphoenolpyruvate catalyzed by PckA, the expression of this enzyme was  
171 decreased 1.7-fold during growth on propionate compared with growth on succinate. This  
172 may indicate a role for allosteric regulation in modulating PckA enzyme activity (24, 25).

173         When compared with growth on succinate, the glyoxylate shunt enzymes, *isocitrate*  
174 *lyase* (AceA; 5.5 FC) and *malate synthase* (GlcB; 3.6 FC) were highly expressed on  
175 propionate. This was also verified using promoter-luciferase transcriptional fusions (**Figure**  
176 **S1F-I**). However, the fluxomics data indicated that there was no carbon flux through the  
177 glyoxylate shunt during growth on either succinate or propionate as a sole carbon source.  
178 This may be explained by the extensive allosteric interactions which are known to control  
179 flux partitioning between the TCA cycle and glyoxylate shunt. *Isocitrate lyase* (ICL) activity in  
180 *Pa* is allosterically inhibited by oxaloacetate, pyruvate, succinate, phosphoenolpyruvate  
181 (PEP), and CoA. By contrast, oxaloacetate and pyruvate allosterically activate one of the  
182 *isocitrate dehydrogenase* enzymes, IDH (26). As flux to pyruvate is significantly increased  
183 during growth on either succinate or propionate compared with acetate (where flux through  
184 the glyoxylate shunt is maximal), these data suggest that pyruvate is the most likely



185 metabolite responsible for abrogating flux through the glyoxylate shunt during growth on  
186 propionate (27).

187         Several studies have suggested that simple diffusion across the cytoplasmic  
188 membrane is the predominant mechanism of both acetate and propionate uptake in  
189 bacteria (28, 29). One cluster of ORFs (PA3232-PA3235) were up-regulated (ca. 16 FC) during  
190 growth on propionate, and encode a putative acetate permease (ActP). Indeed, PA3234  
191 shows 80% amino acid identity to the ActP protein from *Escherichia coli*, and this ORF has  
192 been previously shown to be regulated by the two component system, MxtR/ErdR, which is  
193 essential for growth on acetate (30, 31). MxtR was also up-regulated during growth on  
194 propionate (8.7 FC), whereas proteins associated with dicarboxylic acid transport (DctA,  
195 DctQ, DctP and PA5530) were more abundant during growth on succinate (**File S1A**) (32, 33).

196         Aerobic growth in different carbon sources results in large-scale remodelling of the  
197 electron transport chain in Pa, including components of the denitrification pathway (27).  
198 Growth on propionate led to significantly increased expression of most terminal oxidases,  
199 particularly the quinol oxidase Cyo (7.6 FC), the cyanide-insensitive oxidase Cio (5.4 FC), the  
200 cytochrome c oxidase Cco2 (3.0 FC) and the cytochrome oxidase Cox (2.2 FC). Furthering the  
201 notion of an altered redox balance during growth on the two substrates, we noticed  
202 differences in expression of the NAD(P) transhydrogenases, which fine-tune the size and  
203 degree of reduction of the nicotinamide adenine dinucleotide pools (34). Expression of the  
204 transhydrogenase Sth (PA2991) which is thought to primarily convert NADPH → NADH, was  
205 increased during growth on propionate (2.1 FC), whereas the transhydrogenase proteins  
206 PntAA (3.6 FC) and PntB (2.2 FC) (which presumably catalyze the interconversion NADH →  
207 NADPH) were more abundant during growth on succinate. These alterations were reflected

208 in the redox balances; growth on propionate resulted in a lower NADPH surplus (as any  
209 excess is assumed to be converted to NADH to drive ATP synthesis) when compared with  
210 growth on succinate (**Figure S2**).

211 The 2MCC also serves a role in the catabolism of branched chain amino acids (BCAA).  
212 This is because *isoleucine* and *valine* degradation generates propionyl-CoA, which can then  
213 be degraded to succinate and pyruvate *via* the 2MCC (35). The metabolism  
214 of *valine* produces the intermediate (S)-3-hydroxyisobutyric acid which is oxidized to  
215 methylmalonate semialdehyde by 3-hydroxyisobutyrate dehydrogenase (MmsB).  
216 Methylmalonate semialdehyde dehydrogenase (MmsA) then catalyses the irreversible  
217 NAD<sup>+</sup>- and CoA-dependent oxidative decarboxylation of the semialdehyde to yield  
218 propionyl-CoA (35, 36). MmsB (28.1 FC) and MmsA (5.3 FC) expression were significantly  
219 increased during growth on propionate. This suggests that there is a regulatory link between  
220 the 2MCC and BCAA catabolism in *Pa*.

### 221 **Propionate inhibits the growth of *Pa* when propionate catabolism is disrupted**

222 Based on the proteomics data, we made (separate) in-frame deletions in a selection  
223 of genes putatively involved in propionate uptake (PA3234 – the *actP* homologue),  
224 propionate activation (*acsA*, PA3568) and propionate catabolism (*prpC*, *mmsA*, *aceA*, *glcB*)  
225 and tested the ability of the resulting mutants to grow on a series of single carbon sources  
226 (**Figure 3A, Figure S3A-C**). Importantly, the acetyl-CoA synthetase mutant ( $\Delta acsA$ ) exhibited  
227 a pronounced growth defect with either acetate or propionate as a sole carbon source,  
228 suggesting that activation of propionate is carried out primarily by this enzyme (**Figure**  
229 **S3B,C**). By contrast, the  $\Delta PA3568$  mutant (defective in another potential propionyl-CoA  
230 synthetase) and the putative acetate symporter ( $\Delta PA3234$ ) mutant had no growth

231 phenotype in any of the conditions tested. Similarly, the mutants defective in *mmsA*, *aceA*,  
232 or *glcB* also exhibited no growth defects on propionate, despite significant up-regulation of  
233 the corresponding gene products during growth on this carbon source. Notably, the 2-  
234 methylcitrate synthase mutant ( $\Delta prpC$ ) was unable to grow on propionate as a sole carbon  
235 source but displayed no detectable growth deficit on any of the other tested carbon  
236 sources.

237 In the absence of a functional 2-methylcitrate synthase (PrpC), the accumulation of  
238 intracellular propionyl-CoA, either through direct catabolism of propionate or through  
239 catabolism of branched chain amino acids, has been proposed to have growth inhibitory  
240 properties for several microorganisms (37–39). As shown in **Figure 3B**, when propionate (5-  
241 20 mM) is added to LB agar, growth of the  $\Delta prpC$  mutant becomes progressively more  
242 inhibited as the concentration of propionate increases. The growth inhibitory effect of  
243 propionate on the  $\Delta prpC$  mutant was also apparent when propionate was added to MOPS-  
244 buffered succinate, ruling out pH dependent toxicity (**Figure S3D**). Notably, the  $\Delta prpC$   
245 mutant was also unable to grow on branched chain amino acids as a sole carbon source  
246 (**Figure S3E**). To examine this possible growth inhibition by propionyl-CoA further, we  
247 exposed PAO1 and the  $\Delta prpC$  mutant to 5 mM propionate during exponential growth on  
248 succinate (25 mM). Then, after a further 3 h of growth, we measured the intracellular  
249 propionyl-CoA levels in each sample (**Figure 3C**). This revealed that even during growth on a  
250 preferred carbon source, succinate, propionyl-CoA accumulates in the  $\Delta prpC$  mutant  
251 compared with wild-type PAO1.

252 We previously characterized the metabolic pathways expressed in Pa during growth  
253 on acetate (27). Comparison of those data with the results presented here for growth on

254 propionate revealed several commonalities, including increased expression of *AcsA*, PA3234  
255 (the *actP* homologue), and the glyoxylate shunt enzymes on acetate and propionate. This  
256 may reflect the activity of shared regulators, or analogous reaction mechanisms and  
257 overlapping substrates (**Figure 3D**). As shown in **Figure S3F** and consistent with the  
258 fluxomics data (which revealed negligible flux through the glyoxylate shunt during growth  
259 on propionate), mutants defective in the glyoxylate shunt enzymes,  $\Delta aceA$  and  $\Delta glcB$ ,  
260 suffered no growth defect on propionate as a sole carbon source. As expected, the same  
261 mutants were unable to grow on acetate as a sole carbon source (**Figure S3F**). Remarkably,  
262 this growth of the  $\Delta aceA$  and  $\Delta glcB$  mutants on propionate was blocked when acetate was  
263 added to the media (**Figure 3E**). This growth inhibition could be partially relieved by  
264 increasing the concentration of propionate in the media, suggesting metabolic competition  
265 between acetate and propionate catabolism (**Figure 3E**). By contrast, acetate did not  
266 prevent growth of the  $\Delta aceA$  and  $\Delta glcB$  mutants on plates containing succinate (**Figure S3F**).  
267 In the absence of the glyoxylate shunt, acetyl-CoA generated through the activation of  
268 acetate or through  $\beta$ -oxidation of fatty acids is unable to contribute to *Pa* biomass  
269 generation. Since *AcsA* likely activates both acetate and propionate, a parsimonious  
270 hypothesis is that saturating concentrations of acetate (which is probably the preferred  
271 substrate of *AcsA*) competitively block the activation of propionate. This competition is  
272 relieved at higher propionate concentrations, thereby enabling growth of the  $\Delta aceA$  and  
273  $\Delta glcB$  mutants.

#### 274 **Structural and functional investigation of PrpC and GltA from Pa**

275 PrpC catalyzes the condensation of oxaloacetate and propionyl-CoA. In a parallel  
276 reaction, the TCA cycle enzyme, citrate synthase (*GltA*), catalyzes the condensation of

277 oxaloacetate and acetyl-CoA. Given the apparent promiscuity of AcsA with respect to  
278 acetate and propionate activation, we wondered whether the condensation of propionyl-  
279 CoA and acetyl-CoA with oxaloacetate could be carried out interchangeably by PrpC and  
280 GltA (**Figure 3D**). Indeed, PrpC from *E. coli* has secondary citrate synthase activity and  
281 overexpression of *prpC* in this organism can rescue the synthetic lethality of citrate synthase  
282 loss (40–43). To examine whether this is also the case in Pa, a  $\Delta$ *gltA* mutant was generated.  
283 Colonies of the  $\Delta$ *gltA* mutant on LB agar were visibly smaller when compared with wild-type  
284 PAO1 (**Figure 4A**). This phenotype could be partially complemented by supplementing the  
285 plates with glutamate, whose carbon skeleton enters the TCA cycle after the citrate  
286 synthase-catalyzed step (**Figure S4A**).

287 To assess directly whether PrpC<sub>Pa</sub> has citrate synthase activity (and whether citrate  
288 synthase may also have 2-MC synthase activity), we purified each enzyme to investigate its  
289 specificity and kinetic properties *in vitro*. The Pa *prpC* and *gltA* genes were cloned and  
290 overexpressed (with cleavable His<sub>6</sub> tags) in *E. coli*, and purified to homogeneity. Each  
291 purified enzyme was then assayed for 2-methylcitrate synthase activity and citrate synthase  
292 activity. The PrpC enzymes from species including *S. enterica*, *E. coli*, and *B. subtilis* have  
293 previously been reported to exhibit a strong preference for propionyl-CoA compared with  
294 acetyl-CoA (42, 44, 45). However, PrpC<sub>Pa</sub> displayed roughly comparable activity towards  
295 these acyl-CoAs, although  $V_{\max}$  was greater with propionyl-CoA as a substrate (**Figure 4B**,  
296 **S4B**). The specificity (expressed as  $k_{\text{cat}}/K_M$ ) of PrpC<sub>Pa</sub> for propionyl-CoA was  $104 \times 10^3 \text{ M}^{-1} \text{ s}^{-1}$ ,  
297 whereas for acetyl-CoA  $k_{\text{cat}}/K_M$  was  $114 \times 10^3 \text{ M}^{-1} \text{ s}^{-1}$  (**Table S1C**). By contrast, and unlike GltA  
298 from *S. enterica* (which exhibits a low level of 2-methylcitrate synthase activity (46)), GltA  
299 from Pa (GltA<sub>Pa</sub>) had no detectable 2-methylcitrate synthase activity (**Figure 4C**).

300 To gain insights into the possible structural bases for these kinetic data, we used x-  
301 ray crystallography to solve the structure of PrpC<sub>Pa</sub> and GltA<sub>Pa</sub> (**Figure 4D**). PrpC<sub>Pa</sub> is a  
302 homodimer in both the crystal structure (**Figure 4D**) and in solution (**Figure S4D**), whereas  
303 the GltA<sub>Pa</sub> asymmetric unit was comprised of a hexameric “trimer of dimers” (**Figure 4E**).  
304 Structural superposition of PrpC<sub>Pa</sub> and GltA<sub>Pa</sub> revealed a near-identical  $\alpha$ -helical core fold  
305 (**Figure 4F**) with a C $\alpha$  RMSD of 1.33 Å. GltA<sub>Pa</sub> is slightly larger than PrpC<sub>Pa</sub> (429 amino acids  
306 *versus* 376 amino acids, respectively) and has an additional 50 amino acid residues at its N-  
307 terminus, which form four anti-parallel  $\beta$ -strands and loops (**Figure 4F**). In addition to  
308 solving the apo-structures of the enzymes, we also obtained the structure of PrpC<sub>Pa</sub> with  
309 oxaloacetate bound in the active site (**Figure 5A**). The active site was located in a cleft  
310 between two domains on the enzyme. A comparison of PrpC structures from different  
311 bacterial species revealed that the residues comprising the PrpC<sub>Pa</sub> active site are very highly  
312 conserved. For instance, in *S. enterica* His235 (His222 in PrpC<sub>Pa</sub>), His274 (His 261 in PrpC<sub>Pa</sub>),  
313 and Asp325 (Asp312 in PrpC<sub>Pa</sub>) form a catalytic triad (45).

314 In the PrpC<sub>Pa</sub> apo-structure (open conformation), each protomer in the asymmetric  
315 unit is identical (backbone RMSD of 0.23 Å from a total of 360 C $\alpha$  atoms). However, in the  
316 holo-PrpC<sub>Pa</sub> structure, the conformation of one of the oxaloacetate-bound protomers (chain  
317 D) in the asymmetric unit was different. Each asymmetric unit comprised four monomers of  
318 PrpC<sub>Pa</sub>, but only chain D contained an unambiguous electron density for oxaloacetate  
319 (**Figure 5B**). The other chains (chains A, B and C) had an identical conformation to those of  
320 apo-PrpC<sub>Pa</sub>. Interestingly, the dimerization partner of chain D, chain C, (shown in orange in  
321 **Figure 5A**) had no oxaloacetate in its active site. This raises the possibility that PrpC<sub>Pa</sub>  
322 exhibits half-of-the-sites reactivity, where only one-half of the identical subunits are active  
323 at any given time (47).

324 GltA<sub>Pa</sub> has the essential catalytic triad of residues that are also found in the *Sus*  
325 *scrofula* citrate synthase; His265, His306 and Asp363 (Pa numbering). The side-chain  
326 orientation in this triad is identical in the majority of apo-PrpC and apo-GltA structures,  
327 including PrpC<sub>Pa</sub> (**Figure 5C**). In *S. enterica* PrpC, Tyr197 and Leu324 (Tyr184 and Ala311 in  
328 PrpC<sub>Pa</sub>) have been proposed to confer substrate specificity (45). The corresponding residues  
329 in the citrate synthases are histidine and valine (His227 and Val363 in GltA<sub>Pa</sub>). However, the  
330 PrpC from *A. fumigatus* also has histidine and valine in these positions; hence, the precise  
331 role(s) of these residues in imparting substrate specificity are still not clear. In addition to  
332 binding its substrate, citrate synthase from *E. coli* also binds NADH, and may even be  
333 regulated by this compound. The residues important for NADH binding in GltA from *E. coli*  
334 are Met112 and Cys206 (44). These residues are also present in GltA<sub>Pa</sub>, but they are absent  
335 from PrpC<sub>Pa</sub>. This is consistent with the notion that GltA<sub>Pa</sub> is probably regulated by NADH  
336 (48), whereas this is probably not the case for PrpC<sub>Pa</sub>.

337 Superposition of the apo-PrpC<sub>Pa</sub> and holo-PrpC<sub>Pa</sub> structures highlights the  
338 conformational change associated with oxaloacetate binding (**Figure 5D**). The oxaloacetate-  
339 bound PrpC<sub>Pa</sub> has a more compact configuration, achieved through a 2 Å (average)  
340 movement and 7° rotation of the associated domain toward the centre of the dimer. This  
341 conformation was also observed in the *Sus scrofa* citrate synthase, where it was described  
342 as a “partially closed conformation” (49). The fully closed conformation was observed when  
343 both oxaloacetate and Ac-CoA were bound to the enzyme (50). Compellingly, all acyl-CoA  
344 bound citrate synthase structures in the PDB contain either bound oxaloacetate or bound  
345 citrate. This suggests an ordered reaction sequence. Indeed, in citrate synthase, the binding  
346 of oxaloacetate has been biochemically and structurally demonstrated to bring about a

347 conformational change which appears to be critical for the subsequent binding of Ac-CoA  
348 (49). Presumably, a similar ordered reaction sequence is associated with PrpC<sub>Pa</sub>. Consistent  
349 with the notion that oxaloacetate binding is accompanied by a conformational change in the  
350 enzyme, we observed increased thermal stability of PrpC<sub>Pa</sub> upon the addition of  
351 oxaloacetate (**Figure S4C**).

### 352 **Transcriptomics reveals how Pa responds to challenge with exogenous propionate**

353 From the proteomic data, PrpC<sub>Pa</sub> (and all other enzymes of the 2MCC) were  
354 detectable during growth of Pa on succinate as a sole carbon source, so it is possible that  
355 the 2MCC also serves a non-canonical, uncharacterised role(s) in Pa physiology. To explore  
356 this further, RNA-seq was used to (i) compare the transcriptome of wild-type PAO1 with that  
357 of an isogenic  $\Delta prpC$  mutant during growth on succinate, and (ii) examine how the  
358 transcriptome is perturbed following exposure of succinate-grown cells to a sub-inhibitory  
359 concentration (500  $\mu$ M) of propionate (added during exponential growth (**Figure 6A, S5A-**  
360 **E**)).

361 Consistent with the proteomic data, appreciable *prpC* reads were detected in PAO1  
362 during growth on succinate (**Figure S5B**). This basal expression of the 2MCC enzymes may  
363 benefit the cell by priming it ready for rapid propionyl-CoA detoxification/catabolism.  
364 Relatively few PAO1 transcripts showed substantial alterations in abundance compared with  
365 the  $\Delta prpC$  mutant during growth on MOPS-succinate medium (**File S3, Figure S5D**). This  
366 suggests that the absence of a functional 2MCC does not lead to extensive transcriptional  
367 re-programming during *per se*. Transcripts encoding two enzymes (BkdA1, BkdA2) involved  
368 in branched chain amino acid (BCAA) catabolism were down-regulated in the  $\Delta prpC$  mutant  
369 when compared with the wild-type during growth on succinate. However, this repression



370 was relieved upon exposure of the  $\Delta prpC$  mutant to exogenous propionate (2.2 FC). These  
371 data indicate that in the wild-type, flux through the 2MCC during growth on succinate may  
372 produce low levels of propionate, and that this impacts on BCAA catabolic gene expression.  
373 The source of this propionate could be from the catabolism of endogenously produced,  
374 propionyl-CoA-generating amino acids or possibly through reverse operation of the 2MCC.  
375 The 2MCC has recently to be shown to be reversible in *M. tuberculosis* to allow optimal  
376 metabolism of lactate and pyruvate (51).

377         The most statistically-significant up-regulated transcripts in the wild-type following  
378 challenge with propionate were associated with ORFs PA3415-PA3417 (2.8 FC). These ORFs  
379 are predicted to encode a pyruvate dehydrogenase (PDH) or a branched chain amino acid  
380 dehydrogenase (**File 3, Figure 6B**) (52). Immediately adjacent to the PA3415-PA3417 cluster  
381 is leucine dehydrogenase (*ldh*, PA3418), required for BCAA catabolism, which was also  
382 significantly up-regulated upon propionate exposure. The same ORFs were also up-  
383 regulated in the  $\Delta prpC$  mutant after propionate addition, indicating that full catabolism of  
384 propionate is not required as a cue to activate the expression of these genes (**File S3, Figure**  
385 **S5C**). However, given that propionyl-CoA is an intermediate in the metabolism of BCAA,  
386 these results likely indicate regulatory cross-talk between expression of the PA3415-  
387 PA3417-*ldh* cluster and expression of the enzymes involved in BCAA catabolism.  
388 Unexpectedly, *acsA* and PA3233-PA3235 (the ORF cluster that includes the ActP protein)  
389 which have putative roles, respectively, in propionate activation and transport, were down-  
390 regulated (-2.0 FC) in PAO1 upon propionate addition.

391         Pa responds to propionate exposure by increasing expression of the *prp* operon  
392 (**Figure 6B**). This up-regulation of the *prp* operon was blocked in the  $\Delta prpC$  mutant (**Figure**

393 **S5E, File S3**). We further confirmed the induction of PrpB expression in response to  
394 propionate by western blotting (**Figure S5F**). However, this propionate-induced expression  
395 of PrpB was abolished in the  $\Delta prpC$  mutant (**Figure S5F**). PrpB expression in response to  
396 propionate challenge was maintained in a  $\Delta acsA$  mutant, suggesting that propionyl-CoA can  
397 also be generated from propionate through alternative routes in Pa. *AcsA* expression is  
398 known to be under the control of the response regulator, ErdR, and consistent with this, an  
399  $\Delta erdR$  mutant cannot grown on ethanol or acetate as a sole carbon source (53). Given the  
400 dual role that *AcsA* seems to play in acetate and propionate catabolism, we therefore  
401 examined whether a  $\Delta erdR$  mutant also displays aberrant growth on propionate. It did  
402 (**Figure S5G-I**). Surprisingly, the growth deficit of the  $\Delta erdR$  mutant on propionate was even  
403 more pronounced than that of a  $\Delta acsA$  mutant. This indicates that additional downstream  
404 targets of ErdR, such as *ErcS*, *ErbR* or the ethanol oxidation system, may also be required for  
405 optimal propionate catabolism in Pa (54).

406         How is propionate assimilated in Pa and converted to propionyl-CoA, activating the  
407 2MCC operon even when preferable carbon sources are readily available? Carbon catabolite  
408 repression (CCR) allows Pa to selectively assimilate a preferred compound when a selection  
409 of carbon sources are available. In Pa, CCR is controlled through translational silencing,  
410 mediated by Hfq and the small protein Crc (55). Reversing this translational silencing  
411 requires the small RNA (sRNA) *CrcZ*, which sequesters Hfq thereby preventing the latter  
412 from binding to target transcripts. *CrcZ* abundance is controlled by a two-component  
413 system, *CbrAB*, which senses and responds to carbon availability (55). In Pa, *acsA* mRNA  
414 harbours a sequence motif located upstream of the *acsA* start codon, which brings acetate  
415 assimilation under CCR control. Because they are impaired in *CrcZ* expression, mutants  
416 defective in *cbrB* exhibit a severe growth defect when grown on acetate as a sole carbon

417 source ((56) and **Figure S5I**). We found that a  $\Delta cbrB$  mutant also had a clear growth defect  
418 on propionate (**Figure S5H**). However, since the  $\Delta cbrB$  mutant maintained inducible PrpB  
419 expression upon propionate exposure (**Figure S5J**), this suggests that CCR does not exert  
420 direct control over the 2MCC, but may impact on propionate catabolism indirectly e.g., by  
421 affecting *acsA* expression and/or other peripheral targets.

422         Since CCR did not appear to be directly coordinating the expression of the 2MCC, this  
423 prompted us to examine in more detail the role of the GntR-family TF, PrpR (PA0797) in  
424 controlling *prp* gene expression. GntR family TFs are typically regulated by ligands that are  
425 metabolic substrates/products/cofactors associated with the products of the genes that  
426 they regulate (57). Previous studies in *Corynebacterium glutamicum* and *S. enterica*  
427 established that 2-methylcitrate (2-MC), the reaction product of PrpC, is a co-activator of  
428 the Fis-family PrpR in these species (58, 59). By contrast, PrpR from *M. tuberculosis* is a  
429 4Fe4S protein that employs propionyl-CoA as a co-activator (60). Our observation, that the  
430 2MCC is not induced upon exposure to propionate in a  $\Delta prpC$  mutant (**Figure S5E,F**), is  
431 consistent with 2-MC rather than propionyl-CoA being the co-activator, especially given that  
432 propionyl-CoA accumulates in a  $\Delta prpC$  mutant following propionate challenge (**Figure 3C**).

433         In contrast to all other species characterized to date, the  $\Delta prpR$  mutant of Pa had no  
434 growth defect on any of the carbon sources tested (**Figure S5H-J**). This suggested that the  
435 canonical model of 2MCC regulation by PrpR established for other organisms does not apply  
436 in Pa. Remarkably, PrpB was over-expressed in the  $\Delta prpR$  mutant during growth on  
437 succinate, independent of the presence or absence of propionate in the medium (**Figure**  
438 **6C**). This suggested that Pa PrpR may actually be a *repressor* of the 2MCC, rather than an  
439 activator (58). Consistent with this, expression of *prpR* from a plasmid (pUCP20) in the  $\Delta prpR$

440 mutant was sufficient to repress PrpC expression in this strain (**Figure S6A**). The predicted  
441 PrpR binding motif in Pa, identified by phylogenetic footprinting, is a 12-nucleotide  
442 palindrome with the consensus sequence ATTGTCGACAAT (16); this sequence is found  
443 upstream of PrpR (84 bp) in PAO1 and PA14. PrpR was recombinantly-expressed and  
444 purified to homogeneity (**Figure S6B**) for electrophoretic mobility shift analyses (EMSA;  
445 **Figure S6C**). These data revealed that PrpR does indeed bind to the upstream region of  
446 *prpR*.

447         Somewhat surprisingly, we found that a Pa citrate synthase mutant ( $\Delta$ *gltA* – **Figure**  
448 **4A**) could also grow on single carbon sources in minimal media, albeit with a prolonged lag  
449 phase. Given that PrpC<sub>pa</sub> can carry out the condensation of acetyl-CoA with oxaloacetate  
450 (**Figure 4B**) and can therefore potentially substitute for GltA, we suspected that the viability  
451 of the  $\Delta$ *gltA* mutant on single carbon sources might be explained by induction of *prpC*.  
452 Consistent with this, and despite repeated attempts at doing so, we were unable to make a  
453  $\Delta$ *gltA*  $\Delta$ *prpC* double mutant. If our hypothesis is correct, and given that *prpC* expression is  
454 repressed by PrpR, we began to wonder whether *prpR* in the  $\Delta$ *gltA* mutant might be under  
455 strong selection pressure to acquire loss-of-function mutations, thereby boosting PrpC  
456 expression. Commensurate with this, successive rounds of sub-culturing of the  $\Delta$ *gltA* mutant  
457 in MOPS-succinate readily yielded heritable derivatives displaying a restoration of rapid  
458 growth in this medium. Furthermore, these “evolved”  $\Delta$ *gltA* mutants also constitutively  
459 expressed PrpC and PrpB, independent of propionate addition (**Figure 6C, S6A**). A similar  
460 restoration of rapid growth in MOPS-succinate medium was observed when we deleted  
461 *prpR* in the  $\Delta$ *gltA* background (**Figure S6D**).

462 But are loss-of-function mutations in *prpR* the most probable evolutionary path  
463 taken by the  $\Delta$ *gltA* mutant to overcome its metabolic bottleneck? Alternative mechanisms  
464 could include mutation of the PrpR binding site upstream of the *prp* operon, duplication of  
465 *prpC*, or inactivation of one or more uncharacterized genes involved in modulating PrpR  
466 expression. To investigate this further, we made fresh deletions in *gltA* (to minimize the  
467 possibility of the strain acquiring additional mutations prior to passaging). Three  
468 independent  $\Delta$ *gltA* mutant colonies were isolated and passaged in MOPS-succinate for two  
469 days; all three cultures displayed wild-type levels of growth after this time (**Figure 6D, S6D**).  
470 The three independently evolved  $\Delta$ *gltA* mutants were sent for whole-genome sequencing  
471 alongside the wild-type progenitor (**Figure S6E**). Strikingly, each of the three evolved  $\Delta$ *gltA*  
472 mutants (EVOL\_1-3) had accrued distinct missense mutations in *prpR* giving rise to the  
473 amino acid substitutions V80L (EVOL\_1) and R54H (EVOL\_3) in PrpR, or a 6 bp deletion in  
474 *prpR* leading to the loss of amino acids L67 and R68 in PrpR (EVOL\_2). These residues were  
475 mapped on to the AlphaFold-generated structure of PrpR, which indicated that they fall  
476 within and proximal to the conserved winged helix-turn-helix (wHTH) domain of this  
477 repressor – a region crucial for the DNA-binding in this family of transcription factors (**Figure**  
478 **6E**) (61, 62). Indeed, mutation of residue R52 (equivalent to residue R54 in PqsR) in the *E. coli*  
479 MqsR-controlled colanic acid and biofilm regulator (McbR) results in a loss of DNA-binding  
480 (57). This provides clear evidence that in the absence of *gltA*, *prpR* is reproducibly mutated  
481 to facilitate *prpC* over-expression.

## 482 **Discussion**

483 We have carried out a systems-level characterisation of Pa during growth on  
484 succinate and propionate as sole carbon sources. This revealed previously undiscovered

485 transcriptional and metabolic crosstalk between several major metabolic pathways/cycles;  
486 the 2MCC, BCAA catabolism and the glyoxylate shunt. Our work also provides mechanistic  
487 insight into how enzyme promiscuity and regulatory rewiring can rapidly overcome the loss  
488 of a key enzyme in the TCA cycle, citrate synthase. We show that Pa can survive the loss of  
489 citrate synthase (GltA) through a combination of low, basal-level expression of PrpC,  
490 followed by acquisition of loss-of-function mutations in the transcriptional repressor *prpR*.  
491 This leads to a compensatory increase in secondary citrate synthase activity through PrpC  
492 over-expression (**Figure 7A-C**).

493 We found that Pa responds to propionate exposure by increasing expression of the  
494 *prp* operon. This propionate-dependent expression of the 2MCC was unaffected by carbon  
495 catabolite repression (CCR) or by deletion of the primary short-chain acyl-CoA synthetase,  
496 AcsA. This may reflect the established appetite of Pa for organic acids (1), but it could also  
497 be that the primary role of the 2MCC is in propionate detoxification, rather than routine  
498 carbon assimilation. It appears that Pa counters rapid propionyl-CoA generation by having  
499 an exceptionally responsive 2MCC which promptly degrades inhibitory metabolic  
500 intermediates. In *M. tuberculosis*, this detoxification is carried out by the constitutively  
501 expressed methylmalonyl-CoA (MMCO) pathway, which can quickly react to sudden changes  
502 in propionate concentration and detoxify the cell accordingly. By contrast, the role of the *M.*  
503 *tuberculosis* 2MCC appears to be as a “professional catabolizer”, with a higher overall flux  
504 capacity than the MMCO (63). The absence of a functional MMCO in Pa means that this  
505 organism depends exclusively on the 2MCC for both the assimilation and detoxification of  
506 propionate.

507           The trade-off between responsiveness to propionate and the accumulation of  
508 cytotoxic 2MCC intermediates is a structural weakness of this catabolic arrangement; a  
509 weakness that can potentially be exploited to fight *Pa* infections. Importantly, a synthetic  
510 PrpC inhibitor was bacteriostatic against *M. tuberculosis* grown in cholesterol media  
511 (cholesterol is broken down by *M. tuberculosis* to yield propionyl-CoA). This suggests that  
512 cell-permeable PrpC-specific inhibitors are indeed achievable (64). Considering the structural  
513 similarity between PrpC and GltA, it may be possible to generate an inhibitor which targets  
514 both enzymes simultaneously. This could be a powerful combination, as a transposon  
515 mutagenesis screen indicated that *gltA* is required for the growth of nine different *Pa* strains  
516 from diverse sources when cultured in four infection-relevant growth conditions (LB, M9  
517 glucose, sputum, and serum) (65). Interestingly, most of these strains did not require *gltA*  
518 for growth in urine (65, 66). However, the current work highlights the risk of targeting GltA  
519 exclusively, since *Pa* can swiftly compensate for the loss of GltA activity by increasing PrpC  
520 expression (through PrpR inactivation) (**Figure 7**).

521           Mutations in core metabolic genes are strongly associated with antimicrobial  
522 resistance, although our insight the mechanistic basis for this is poorly understood (67–69).  
523 Crucially, pathogen lifestyles vary, and this in turn leads to major alterations in the  
524 regulatory architecture of primary metabolism. These design variations mean that many of  
525 the metabolic innovations that facilitate adaptation to new environments (or to  
526 antimicrobial challenge) are pathogen specific.

527           Can we predict the potential routes of mutation and genetic evolution? Addressing  
528 this is a central challenge for evolutionary systems biology, and requires a clear  
529 understanding and appreciation of microbial metabolic network diversity. As shown in the

530 current work, large-scale comparative ‘omics analyses, in combination with reverse  
531 genetics, can provide mechanistic insights into the complex evolutionary trajectories of  
532 underground metabolism. Indeed, the specific path to de-repression of *prpC* expression in  
533 *Pa* (*via prpR* inactivation) that allows the cell to survive in the absence of citrate synthase  
534 simply cannot happen in *E. coli* or indeed, in many other human pathogens, due to key  
535 differences in metabolic architecture, enzymology, and gene regulation (70). Therefore, the  
536 strategic inhibition of organic acid catabolism in *Pa* through inhibition of PrpC and GltA  
537 activity may be a potent mechanism to halt the growth of this pathogen during infection in  
538 environments where propionate is abundant.

539

540

541

542

### 543 **Acknowledgements**

544 This work was funded by grants BB/M019411/1 and BB/R005435/1/FAPESP from the  
545 BBSRC. SKD was supported by a Herchel Smith Postdoctoral Fellowship. Elements of this  
546 work were supported by an EMBO Short Term Fellowship to SKD (7293-2017). CW  
547 acknowledges support by the German Federal Ministry for Education and Research (BMBF)  
548 through the grants “BioNylon” (FKZ 03V0757) and “LignoValue” (FKZ 031B0344A) and by the  
549 German Research Foundation (DFG) through the grant “ePseudomonas” (WI-1796/4-1)  
550 within the Priority Programme “eBiotech” (SPP 2240). We thank the Cambridge Centre for



551 Proteomics, including Dr Mike Deery, Mrs Renata Feret and Prof Kathryn Lilley for  
552 proteomics support.

553

#### 554 **Competing Interests Statement**

555 The authors declare that they have no competing interests.

556

557

558

559

560

561

562

563

564

#### 565 **Materials and Methods**

##### 566 **Growth conditions.**

567 Unless otherwise indicated, *P. aeruginosa* strain PAO1 (71) was routinely grown in lysogeny  
568 broth (LB LENNOX) (Oxoid Ltd) at 37°C with good aeration (shaking at 250 rpm). The strains  
569 used in this study are listed in **Table S1A**. The overnight pre-cultures were started from  
570 separate clonal source colonies on streaked LB agar plates. Strains were cultured in MOPS

571 (morpholinepropanesulfonic acid) media with the relevant carbon sources (72). Cell growth  
572 was monitored as optical density in a spectrophotometer (BioSpectrometer®, Eppendorf) at  
573 a wavelength of 600 nm (OD<sub>600</sub>). A previously determined conversion factor of 0.42 g cell  
574 dry weight (CDW) per OD<sub>600</sub> unit was used to calculate biomass specific rates and yields  
575 from the obtained OD<sub>600</sub> values (73).

#### 576 **Transcriptomics (RNA-Seq).**

577 *P. aeruginosa* strain PAO1 and  $\Delta prpC$  were grown in 40 ml MOPS with succinate (30 mM) as  
578 the sole carbon source (six flasks per strain) at 37°C with good aeration (shaking at 250 rpm)  
579 in baffled flasks (500 ml volume). At OD<sub>600</sub> 0.2, 500  $\mu$ M sodium propionate was spiked into  
580 three of the PAO1 cultures and three of the  $\Delta prpC$  cultures. An equal volume of H<sub>2</sub>O was  
581 added to the control PAO1 and  $\Delta prpC$  cultures. After 2 hr, an aliquot (5 ml) of culture was  
582 removed from each sample. At this stage, the culture OD<sub>600</sub> was  $\cong$  0.7 (exponential growth).  
583 These aliquots were added to an equal volume of RNeasy® RNA stabilization solution. RNA  
584 was then isolated using a RNeasy Mini Kit (Qiagen). Ribosomal RNA (rRNA) was  
585 subsequently depleted from each RNA sample (5  $\mu$ g each) using the bacterial Ribo-Zero  
586 rRNA Removal Kit (Illumina). The integrity of the RNA was evaluated using an RNA 6000  
587 Nano LabChip and an Agilent 2100 Bioanalyzer (Agilent Technologies, Germany). Twelve  
588 indexed, strand-specific cDNA libraries were prepared, and samples were sequenced on an  
589 Illumina HiSeq 2000 with a 51 bp single-end read length (GATC Biotech, Germany). The  
590 sequencing data are deposited at ArrayExpress (accession number E-MTAB-10077).

#### 591 **Reads mapping and annotations.**

592 The FASTQ files were mapped to the PAO1 genome obtained from the Pseudomonas  
593 Genome Database (PGD) (<http://www.pseudomonas.com/>) using Bowtie v.0.12.8

594 [38]. The sequence reads were adaptor clipped and quality trimmed with trimmomatic (74)  
595 using the default parameters. The Integrative Genomics Viewer was used to visually inspect  
596 mapping quality and the absence of *prpC* reads in the  $\Delta prpC$  mutant. Read summarization  
597 was performed using featureCounts (75). DESeq2 was employed to analyse differentially-  
598 expressed genes (76). Annotations of differentially expressed genes were obtained from the  
599 reference annotation of the *Pseudomonas* genome available at the PGD website. Genes  
600 were considered as significantly induced or repressed when their adjusted-P value was  
601 <0.05 (File S3).

#### 602 **Quantitative proteomic analysis.**

603 *P. aeruginosa* PAO1 cells (OD<sub>600</sub> = 0.5, 30 ml) were grown at 37°C in 40 ml MOPS with  
604 succinate (30 mM) or propionate (40 mM) as the sole carbon source, with good aeration  
605 (shaking at 250 rpm) in baffled flasks (500 ml volume). Cultures were grown and analysed in  
606 triplicate. The cell pellets were resuspended in 2 ml lysis buffer (100 mM Tris-HCl, 50 mM  
607 NaCl, 10% (v/v) glycerol, 1 mM *tris*(2-carboxyethyl)phosphine (TCEP), pH 7.5) containing one  
608 cOmplete Mini protease inhibitor cocktail (Roche). Following three rounds of sonication (3 ×  
609 10 sec) on ice, supernatants were clarified by sedimentation (21130 × *g*, 15 min, 4°C) in an  
610 Eppendorf 5424R centrifuge. Aliquots (100 µg) of each sample were reduced with TCEP,  
611 alkylated with iodoacetamide and labelled with Tandem Mass Tags (TMTs). TMT labelling  
612 was carried out according to the manufacturer's protocol.

#### 613 **LC-MS/MS.**

614 LC-MS/MS analyses were carried out using a Dionex Ultimate 3000 RSLC nanoUPLC (Thermo  
615 Fisher Scientific Inc, Waltham, MA, USA) system in-line with a Lumos Orbitrap mass  
616 spectrometer (Thermo Fisher Scientific Inc, Waltham, MA, USA) (27). Separation of peptides

617 was performed by C18 reverse-phase chromatography at a flow rate of 300 nL/min using a  
618 Thermo Scientific reverse-phase nano Easy-spray column (Thermo Scientific PepMap C18, 2  
619  $\mu\text{m}$  particle size, 100 Å pore size, 75  $\mu\text{m}$  i.d. x 50 cm length).

#### 620 **Proteomic data analysis.**

621 Proteome Discoverer v2.1 (Thermo Fisher Scientific) and Mascot (Matrix Science) v2.6 were  
622 used to process raw data files. The data were aligned with the UniProt *Pseudomonas*  
623 *aeruginosa* (5584 sequences) common repository of adventitious proteins (cRAP) v1.0. The  
624 R package, MSnbase (77), was used for processing proteomics data. Protein differential  
625 abundance was evaluated using the Limma package (78). Differences in protein abundances  
626 were statistically determined using Student's *t*-test with variances moderated by Limma's  
627 empirical Bayes method. *P*-values were adjusted for multiple testing by the Benjamini-  
628 Hochberg method (79). Proteins were considered as increased or decreased in abundance,  
629 when their  $\log_2$  fold-change was  $>1$  or  $<-1$ , respectively, and their *p*-value was  $<0.05$ . The  
630 mass spectrometry proteomics data have been deposited to the ProteomeXchange  
631 Consortium *via* the PRIDE (55) partner repository with the data set identifier PXD015792.

#### 632 **Genome sequencing.**

633 Genomic DNA was extracted from PAO1 and three evolved  $\Delta\text{gltA}$  mutants (EVOL\_1-3) using  
634 a GeneJET Genomic DNA Purification Kit following 50 generations of growth in MOPS-  
635 succinate. Genome sequencing of all four strains was carried out by MicrobesNG  
636 (<http://www.microbesng.uk>), and the reads were analysed and displayed using IGV (80).

#### 637 **Construction of in-frame *P. aeruginosa* PAO1 deletion mutants.**

638 Flanking regions 800-1000 bp upstream and downstream of the desired genes were PCR  
639 amplified. The upstream and downstream regions were then overlapped and cloned into  
640 the suicide vector, pEX19Gm, using Gibson assembly as described previously (81). The  
641 resulting deletion plasmid was then introduced into *P. aeruginosa* by electroporation and  
642 selected for on LB plates containing 50 µg/ml gentamicin. Deletion mutants were identified  
643 via SacB-mediated sucrose counter-selection and confirmed by PCR. Primers used are  
644 described in **Table S1B**.

#### 645 **Construction of luciferase reporter strains.**

646 Transcriptional reporter constructs were made by fusing the upstream promoter sequences  
647 of the indicated genes with the *luxCDABE* cluster using the primers listed in **Table S1B**. The  
648 purified PCR products were digested and directionally ligated into the multiple cloning site  
649 of plasmid pUC18T-mini-Tn7T-lux-Gm (82). The mini-Tn7-lux element was introduced into  
650 PAO1 (where it integrated into the chromosome) by electroporation along with the helper  
651 plasmid pTNS2, as previously described (83). Luciferase and OD<sub>600</sub> readings were measured  
652 using a BMG Labtech FLUOstar Omega microplate reader. Strains were cultured in MOPS  
653 media with the indicated carbon sources (100 µL) in 96-well microplates (Greiner bio-one, F-  
654 Bottom, Black) covered with gas permeable imaging seals (4titude - 4ti-0516/96). Luciferase  
655 expression was assessed during exponential growth. Growth was measured by taking OD<sub>600</sub>  
656 readings simultaneously with the luminescence readings. Luciferase readings were  
657 expressed as relative luminometer units (RLU) normalised to OD<sub>600</sub> in order to control for  
658 growth rate differences in the selected carbon sources.

#### 659 **<sup>13</sup>C fluxomics.**

660 Starter cultures were prepared by inoculating LB medium with a loop of freshly plated  
661 PAO1. After 6 hr of incubation, 50  $\mu$ L of cell suspension was transferred to a second culture  
662 of MOPS minimal medium containing the desired substrate (see below). Subsequently,  
663 exponentially growing cells were used as an inoculum for the main cultures. In the main  
664 cultures, PAO1 was grown in 25 mL of minimal medium in baffled shake flasks (250 mL  
665 volume) with good aeration (shaking at 200 rpm, 37°C) in an orbital shaker (Aquatron, Infors  
666 AG, Switzerland). In these conditions, the oxygen level is maintained above 80% of  
667 saturation (73).

668

669 For the second and main cultures, PAO1 was grown in MOPS minimal media with 40 mM  
670 propionate or 30 mM succinate as the sole carbon source (i.e., 120 mM carbon in each  
671 case). For  $^{13}\text{C}$  flux experiments, naturally labelled propionate and succinate was replaced  
672 with separate tracers (three for propionate, two for succinate) to maximise dataset  
673 resolution and to accurately determine substrate uptake. Naturally labelled propionate was  
674 substituted with [1,3- $^{13}\text{C}_2$ ] sodium propionate (99%), [3- $^{13}\text{C}$ ] sodium propionate (99%) and  
675 an equimolar mixture of [U- $^{13}\text{C}_3$ ] sodium propionate (99%) and naturally labelled sodium  
676 propionate (Sigma-Aldrich, Poole, Dorset, UK). Naturally labelled succinate was substituted  
677 with 99% [1,4- $^{13}\text{C}_2$ ] sodium succinate, 99% [2,3- $^{13}\text{C}_2$ ] sodium succinate or an equimolar  
678 molar 1:1 mixture of [U- $^{13}\text{C}_4$ ] sodium succinate (obtained from Cambridge Isotope  
679 Laboratories, Inc., Andover, MA, USA) and naturally labelled sodium succinate.

680

681 In cultures incubated with  $^{13}\text{C}$ -tracer, the inoculum (initial OD < 0.02) was always kept below  
682 1% of the final sampled cell concentration to exclude potential interference of non-labelled  
683 cells on subsequent calculation of flux (84). Mass isotopomer labelling analysis of

684 proteinogenic amino acids, mass isotopomer labelling analysis of cell sugar monomers  
685 (glucose, ribose and glucosamine), metabolic reaction network and flux calculation were  
686 carried out as described in (20).

#### 687 **Quantification of substrates and products.**

688 Propionate and succinate, as well as organic acids (citric acid,  $\alpha$ -ketoglutaric acid, gluconic  
689 acid, 2-ketogluconic acid, pyruvic acid, succinic acid, lactic acid, formic acid, fumaric acid,  
690 and acetic acid) were quantified in filtered culture supernatants (Costar® Spin-X® 0.22  $\mu$ m)  
691 using isocratic high-performance liquid chromatography (Agilent 1260 Infinity series, s HPX-  
692 87H column operating at 65°C and a flow rate of 0.5 mL min<sup>-1</sup>) equipped with refractive  
693 index (RI) and ultraviolet (UV) detectors (210 nm) with 12 - 50 mM H<sub>2</sub>SO<sub>4</sub> as an eluent (85).  
694 Concentrations were determined from commercial standards which were analysed on the  
695 same run. These data were then used to calculate specific uptake and formation rates, and  
696 biomass yields for propionate, succinate, and secreted by-products, respectively (**File S2**).

#### 697 **Calculation of redox cofactor and ATP balances.**

698 Total production of reduced cofactors was determined by summing up all cofactor-forming  
699 fluxes taking into account substrate-dependent cofactor specificities (86–88). Anabolic  
700 NADPH requirements and anabolically-produced NADH were estimated from the biomass  
701 composition (73, 89) and measured specific growth rates. Surplus NADPH was considered to  
702 be converted into NADH *via* the activities of a soluble (SthA, PA2991) and a membrane-  
703 bound, proton-translocating (PntAB, PA0195-PA0196) pyridine nucleotide  
704 transhydrogenases (34).

705 **ATP:** The total ATP demand was calculated by summing up (i) the anabolic demand needed  
706 for biomass building block synthesis, and (ii) polymerisation estimated from cell composition  
707 multiplied with the corresponding specific growth rate on each substrate (20, 73). We also  
708 took into account the costs of growth-associated maintenance (GAM) and non-growth-  
709 associated maintenance (NGAM) (90) and ATP costs for substrate activation; the full reaction  
710 reference network is shown in **File S2**, (91). The ATP synthesized by oxidative  
711 phosphorylation *via* the respiratory chain was estimated assuming a P/O ratio of 1.875 for  
712 NADH and PQQH<sub>2</sub> (92) and 1.0 for FADH<sub>2</sub> and other quinone (QH<sub>2</sub>) carriers (93), respectively.  
713 The anabolic ATP requirement was calculated from published biomass composition data for  
714 pseudomonads (mainly protein, RNA and lipid synthesis) inclusive of the costs of  
715 polymerising the precursors of these components (73, 94). The GAM and NGAM costs for  
716 pseudomonads was previously modelled using genome-scale models (90, 95). Here, an ATP  
717 surplus represents the amount of ATP available to fulfil remaining cellular ATP-consuming  
718 tasks.

#### 719 **Western-blot analysis.**

720 Equal amounts of protein (10 µg) were resolved on a 12% SDS—polyacrylamide gel. The  
721 resolved proteins were blotted onto a nitrocellulose membrane, which was blocked with 5%  
722 (w/v) skimmed milk powder in TBS buffer. The membranes were probed with rabbit-derived  
723 anti-ICD antibodies, anti-PrpC antibodies or anti-PrpB antibodies (polyclonal antibodies  
724 raised by BioGenes.De). Following washing to remove excess primary antibody, the  
725 membranes were then probed with IRDye® 800CW goat anti-rabbit IgG secondary  
726 antibodies (926-32211). Bands were visualized on an Odyssey Infrared Imaging System (LI-  
727 COR Biosciences).



728 **Enzymatic assays.**

729 The 2-methylcitrate synthase (2-MCS) activity of PrpC was measured using a method  
730 described by Srere *et al* (96) except that propionyl-CoA (PrCoA) was used instead of acetyl-  
731 CoA (AcCoA). Briefly, the condensation reaction of oxaloacetate (OAA) and PrCoA facilitated  
732 by PrpC generates free coenzyme A (CoA). The free CoA thiol group on the liberated CoA  
733 reacts with 5,5'-dithiobis(2-nitrobenzoic acid) (DTNB) to yield 2-nitro-5-thiobenzoate (TNB<sup>2-</sup>)  
734 anions. TNB<sup>2-</sup> is coloured and its formation can be monitored at 412 nm. The initial rate was  
735 calculated from the rate of change of the A<sub>412</sub> assuming an extinction coefficient for TNB<sup>2-</sup> of  
736 14,150 M<sup>-1</sup> cm<sup>-1</sup>. The reaction mixtures contained buffer (50 mM HEPES pH 7.5, 0.1 M KCl,  
737 and 0.54 M glycerol), substrates (OAA and PrCoA at the indicated concentrations) and 0.15  
738 mM DTNB. Reaction mixtures were equilibrated at 37°C for 5 min before the reaction was  
739 initiated by the addition of PrpC (to a final concentration of 240 nM). The reaction was kept  
740 in 37°C and the A<sub>412</sub> was measured in a BioSpectrometer® (Eppendorf). Kinetic parameters  
741 were calculated using best-fit nonlinear regression and plotted using GraphPad Prism  
742 version 6. The citrate synthase (CS) activity of PrpC was measured using the method above  
743 but AcCoA in place of PrCoA. The 2-MCS and CS activity of GltA was measured using PrCoA  
744 and AcCoA respectively.

745 **Protein expression.**

746 The PCR-amplified ORFs of *prpC*, *gltA* and *prpR* were cloned into the expression vector pET-  
747 19m, which introduces a TEV-cleavable N-terminal hexahistidine tag onto each protein. For  
748 purification of the His<sub>6</sub>-tagged proteins, the cells were grown in LB medium (1 L) at 37°C  
749 with good aeration to A<sub>600</sub> = 0.5. The temperature was then lowered to 16°C, and isopropyl  
750 1-thio-β-D-galactopyranoside was added to 1 mM final concentration to induce expression

751 of the cloned genes. The induced cultures were grown for a further 16 h and then harvested  
752 by sedimentation (6000 × *g*, 4°C, 15 min). The cell pellet was resuspended in 20 ml of buffer  
753 A (50 mM sodium phosphate, 100 mM NaCl, 10% (v/v) glycerol, pH 8.0, containing one  
754 dissolved cComplete™ EDTA-free Protease Inhibitor cocktail tablet (Roche)), and the cells  
755 were ruptured by sonication (3 × 10 s, Soniprep 150, maximum power output). The cell  
756 lysate was clarified by centrifugation (11,000 × *g*, 4 °C, 30 min), and the supernatant was  
757 filtered through a 0.45-µm filter. The filtered lysate was then loaded onto a 5 ml Ni-NTA  
758 Superflow column (Qiagen), and the column was washed with buffer A containing 10  
759 mM imidazole. The His<sub>6</sub>-tagged proteins were eluted with buffer A containing 250  
760 mM imidazole. His<sub>6</sub>-tagged TEV-protease (1 mg) was added to the purified protein solution,  
761 and the mixture was dialyzed overnight at 4°C against 2 litres of buffer B (20 mM Tris-HCl,  
762 50 mM NaCl, 5% (v/v) glycerol, pH 7.5). Uncleaved protein and the His<sub>6</sub>-TEV protease were  
763 removed by batch extraction in a slurry of Ni-NTA resin equilibrated in buffer B. The  
764 unbound (cleaved) protein was concentrated to the desired concentration using an Amicon®  
765 Ultra-4 Centrifugal Filter (10 kDa NMW cut-off).

#### 766 **Protein crystallization.**

767 **PrpC.** Crystallization conditions were screened using the sitting drop vapour diffusion  
768 technique with approximately 13-15 mg/mL of purified PrpC solution. Optimization  
769 conditions were prepared using dragonfly® discovery system (TTP LabTech). Protein drops  
770 were generated using an automated nanoliter liquid handler mosquito® HTS (TTP LabTech).  
771 PrpC apo- and holo- (OAA-bound) crystals were obtained in a 1:1 ratio of protein and  
772 reservoir solution (100-200 mM bis-Tris pH 5.5, 20-30% (w/v) PEG 3350, and 0.1% D-xylose).  
773 To obtain the OAA-bound structure of PrpC, the crystallization solution additionally

774 contained 2.5 mM oxaloacetate. All crystals were grown for 2-11 days at 19°C, and were  
775 cryoprotected with 25% (v/v) glycerol and 75% (v/v) reservoir solution prior to mounting in  
776 nylon loops (Hampton Research). Mounted crystals were flash frozen in liquid nitrogen prior  
777 to data collection.

778 **GltA.** Purified GltA at a concentration of 20-25 mg/mL was crystalized by sitting drop vapour  
779 diffusion. Crystals were grown for 7 days at 19°C, and were cryoprotected with 25% (v/v)  
780 glycerol prior to being mounted and flash frozen for data collection.

#### 781 **X-ray diffraction, structure determination and refinement.**

782 **PrpC.** Diffraction data was collected on beamline MX-I03 at the Diamond Light Source  
783 Synchrotron (DLS, Didcot, UK). The parameters for the data collection were as follows;  
784 Omega ( $\Omega$ ) Start: 62.0°,  $\Omega$  Oscillation: 0.10°, Total Oscillation: 180°, Total Images: 1800,  
785 Exposure Time: 0.050 s. Diffraction images were processed using Xia2 DIALS (97). The  
786 structure was determined by molecular replacement using Phaser (98) with the atomic  
787 coordinates of the PrpC from *Coxiella burnetii* (PDB entry: 3TQG) as the search model.  
788 Automated refinement was performed using Refmac5 (99) and PHENIX.refine (100). Manual  
789 modelling and refinement were performed in COOT (101). Data collection and refinement  
790 statistics are listed in **Table S1D**.

791 **GltA.** Data was collected on MX-I03 beamline at the Diamond Light Source Synchrotron  
792 (DLS, Didcot, UK). The parameters for the data collection were as follows; Omega ( $\Omega$ ) Start:  
793 0°,  $\Omega$  Oscillation: 0.20°, Total Oscillation: 240°, Total Images: 1200, Exposure Time: 0.050s.  
794 Diffraction images were processed using Xia2 DIALS (102). The structure was determined by  
795 molecular replacement using Phaser (98) with the atomic coordinates of the type II citrate  
796 synthase from *Vibrio vulnificus* (PDB entry: 4E6Y) as the search model. Automated

797 refinement was performed using Refmac5 (103) and PHENIX.refine (104). Manual modelling  
798 and refinement were performed in COOT (105). Data collection and refinement statistics are  
799 listed in **Table S1D**.

#### 800 **Analytical ultracentrifugation.**

801 Analytical ultracentrifugation-sedimentation velocity (AUC-SV) was conducted in the Department  
802 of Biochemistry (University of Cambridge) Biophysics Facility. Samples were dialyzed  
803 overnight at 4°C against a buffer solution containing 100 mM NaCl and 50 mM Tris-HCl pH  
804 7.5 to remove traces of glycerol. Data were collected using an An60Ti analytical rotor  
805 (Beckman Coulter) in a Beckman Optima XL-I ultracentrifuge with absorbance and  
806 interference optical detection systems. Protein solution (400 µL volume, concentration  
807 approximately 1 mg mL<sup>-1</sup>) and the reference solution (dialysate) were added to the Epon  
808 (epoxy) double-sector centrepieces. All samples were sedimented at 40,000 rpm and 20°C.  
809 Absorbance data ( $A_{280}$ ) were collected in intervals of 2 min and interference scans were  
810 taken every 1 min. The viscosity and density of the buffer used in the experiments were  
811 estimated with SEDNTERP. Data analysis were conducted using SEDFIT.

#### 812 **Protein thermal stability.**

813 Differential scanning fluorimetry experiments were carried out using a CFX Connect RT-PCR  
814 detection system (BioRad) and using Hard-Shell® 96-well PCR plates (BioRad) which are  
815 compatible with the excitation and emission wavelength of SYPRO orange. The temperature  
816 range was 4-95°C with an increment of 1°C every 45 s. The fluorescence was measured  
817 every 15 s. Data was analysed using GraphPad Prism 6.

#### 818 **EMSA analysis.**

819 The region upstream of *prpR* (250 bp, including the 12-nucleotide palindrome) was PCR-  
820 amplified. The forward primer contained a 6-FAM (6-carboxyfluorescein) tag (Sigma). EMSA  
821 reaction mixtures (25  $\mu$ L volume) contained buffer (20% (v/v) glycerol, 30 mM Tris-HCl (pH  
822 8.0), 1 mM  $MnCl_2$ , 120 mM KCl, 1 mM  $MgCl_2$ ) supplemented with 5 pM 6-FAM-labeled  
823 probe, up to 2  $\mu$ M recombinant His<sub>6</sub>-PrpR, 240  $\mu$ g/mL bovine serum albumin (BSA), and 15.2  
824  $\mu$ g/mL poly[d(I-C)]. After incubation at 21°C for 60 min, individual samples were applied to a  
825 6% polyacrylamide gel (Novex) prepared in Tris-borate-EDTA buffer. The samples were  
826 electrophoresed in the same buffer system for 45 min at 120 V. The gels were then imaged  
827 using an Odyssey imager (Li-Cor Biosciences). In the competition EMSA, unlabelled  
828 competitor probes harbouring specific nucleotide substitutions were added in 50-fold molar  
829 excess relative to the labelled probes.

### 830 **LC-MS analysis of propionyl-CoA.**

831 Sampling, analysis and quantification of propionyl-CoA and other CoA esters was carried out  
832 as described previously (106). Briefly, cells from 8 mL cultures grown to OD<sub>600</sub> 2 were  
833 pelleted and re-suspended in 200  $\mu$ L “supercool” ultra-pure water (0°C) and 1 mL  
834 quenching-extraction buffer (95% acetonitrile, 25 mM formic acid, -20°C). The mixture was  
835 vortexed then kept on ice for 10 min, and finally, centrifuged (3 min, 0°C). The supernatants  
836 were transferred into 3 mL of ultra-pure water, then snap-frozen in liquid nitrogen and  
837 lyophilized (Alpha 3-4 LSCbasic, Christ, Germany). The freeze-dried samples were diluted in  
838 500  $\mu$ L pre-cooled resuspension buffer (25 mM ammonium formate, pH 3.0, 2% methanol,  
839 4°C) and immediately analysed by LC-MS (a QTRAP 6500+ (AB Sciex, Darmstadt, Germany)  
840 coupled to an HPLC system (Agilent Infinity 1290)). Commercial standards were used for  
841 quantification. Final concentrations are given as nmol per gram dry cell weight (DCW).

## 842 **References**

- 843 1. Rossi E, La Rosa R, Bartell JA, Marvig RL, Haagenen JAJ, Sommer LM, Molin S, Johansen HK.  
844 2020. *Pseudomonas aeruginosa* adaptation and evolution in patients with cystic fibrosis.  
845 *Nature Reviews Microbiology* 2020 19:5 19:331–342.
- 846 2. Sonnleitner E, Abdou L, Haas D. 2009. Small RNA as global regulator of carbon catabolite  
847 repression in *Pseudomonas aeruginosa*. *Proc Natl Acad Sci U S A* 106:21866–71.
- 848 3. Sun Z, Kang Y, Norris MH, Troyer RM, Son MS, Schweizer HP, Dow SW, Hoang TT. 2014.  
849 Blocking Phosphatidylcholine Utilization in *Pseudomonas aeruginosa*, via Mutagenesis of  
850 Fatty Acid, Glycerol and Choline Degradation Pathways, Confirms the Importance of This  
851 Nutrient Source In Vivo. *PLOS ONE* 9:e103778.
- 852 4. Palmer KL, Mashburn LM, Singh PK, Whiteley M. 2005. Cystic fibrosis sputum supports  
853 growth and cues key aspects of *Pseudomonas aeruginosa* physiology. *J Bacteriol* 187:5267–  
854 5277.
- 855 5. Flynn JM, Niccum D, Dunitz JM, Hunter RC. 2016. Evidence and Role for Bacterial Mucin  
856 Degradation in Cystic Fibrosis Airway Disease. *PLOS Pathogens* 12:e1005846.
- 857 6. Koh A, De Vadder F, Kovatcheva-Datchary P, Bäckhed F. 2016. From dietary fiber to host  
858 physiology: Short-chain fatty acids as key bacterial metabolites. *Cell*. *Cell Press*  
859 <https://doi.org/10.1016/j.cell.2016.05.041>.
- 860 7. Dolan SK, Wijaya A, Geddis SM, Spring DR, Silva-Rocha R, Welch M. 2018. Loving the poison:  
861 The methylcitrate cycle and bacterial pathogenesis. *Microbiology (United Kingdom)* 164.
- 862 8. Muñoz-Elías EJ, Upton AM, Cherian J, McKinney JD. 2006. Role of the methylcitrate cycle in  
863 *Mycobacterium tuberculosis* metabolism, intracellular growth, and virulence. *Molecular*  
864 *Microbiology* 60:1109–1122.
- 865 9. Catenazzi MCE, Jones H, Wallace I, Clifton J, Chong JPJ, Jackson MA, Macdonald S, Edwards J,  
866 Moir JWB. 2014. A large genomic island allows *N. eisseria meningitidis* to utilize propionic  
867 acid, with implications for colonization of the human nasopharynx. *Molecular Microbiology*  
868 93:346–355.
- 869 10. Ibrahim-Granet O, Dubourdeau M, Latgé JP, Ave P, Huerre M, Brakhage AA, Brock M. 2008.  
870 Methylcitrate synthase from *Aspergillus fumigatus* is essential for manifestation of invasive  
871 aspergillosis. *Cellular Microbiology* 10:134–148.
- 872 11. Rohmer L, Hocquet D, Miller SI. 2011. Are pathogenic bacteria just looking for food?  
873 Metabolism and microbial pathogenesis. *Trends in Microbiology* 19:341–348.
- 874 12. Feng J, He L, Xiao X, Chen Z, Chen C, Chu J, Lu S, Li X, Mylonakis E, Xi L. 2020. Methylcitrate  
875 cycle gene MCD is essential for the virulence of *Talaromyces marneffeii*. *Medical Mycology*  
876 58:351–361.
- 877 13. Feinbaum RL, Urbach JM, Liberati NT, Djonovic S, Adonizio A, Carvunis A-R, Ausubel FM.  
878 2012. Genome-Wide Identification of *Pseudomonas aeruginosa* Virulence-Related Genes  
879 Using a *Caenorhabditis elegans* Infection Model. *PLoS Pathogens* 8:e1002813.

- 880 14. Horswili AR, Escalante-semerena JC, Drive L. 1999. The *prpE* gene of *Salmonella typhimurium*  
881 LT2 encodes propionyl-CoA synthetase. *Microbiology (N Y)* 145:1381–1388.
- 882 15. Brock M, Darley D, Textor S, Buckel W. 2001. 2-Methylisocitrate lyases from the bacterium  
883 *Escherichia coli* and the filamentous fungus *Aspergillus nidulans*. *European Journal of*  
884 *Biochemistry* 268:3577–3586.
- 885 16. Suvorova IA, Ravcheev DA, Gelfand MS. 2012. Regulation and evolution of malonate and  
886 propionate catabolism in proteobacteria. *J Bacteriol* 194:3234–40.
- 887 17. D’Ari R, Casadesús J. 1998. Underground metabolism. *BioEssays* 20:181–186.
- 888 18. Liebermeister W, Noor E, Flamholz A, Davidi D, Bernhardt J, Milo R. 2014. Visual account of  
889 protein investment in cellular functions. *Proc Natl Acad Sci U S A* 111:8488–93.
- 890 19. Bernhardt J, Funke S, Hecker M, Siebourg J. 2009. Visualizing gene expression data via  
891 voronoi treemaps. 6th International Symposium on Voronoi Diagrams in Science and  
892 Engineering, ISVD 2009 233–241.
- 893 20. Kohlstedt M, Wittmann C. 2019. GC-MS-based <sup>13</sup>C metabolic flux analysis resolves the  
894 parallel and cyclic glucose metabolism of *Pseudomonas putida* KT2440 and *Pseudomonas*  
895 *aeruginosa* PAO1. *Metabolic Engineering* 54:35–53.
- 896 21. Lai H, Kraszewski JL, Purwantini E, Mukhopadhyay B. 2006. Identification of pyruvate  
897 carboxylase genes in *Pseudomonas aeruginosa* PAO1 and development of a *P. aeruginosa*-  
898 based overexpression system for  $\alpha$ 4- and  $\alpha$ 4 $\beta$ 4-type pyruvate carboxylases. *Applied and*  
899 *Environmental Microbiology* 72:7785–7792.
- 900 22. Kukavica-Ibrulj I, Sanschagrín F, Peterson A, Whiteley M, Boyle B, MacKay J, Levesque RC.  
901 2008. Functional genomics of PycR, a LysR family transcriptional regulator essential for  
902 maintenance of *Pseudomonas aeruginosa* in the rat lung. *Microbiology (Reading)* 154:2106–  
903 2118.
- 904 23. Abdelhamid Y, Brear P, Greenhalgh J, Chee X, Rahman T, Welch M. 2019. Evolutionary  
905 plasticity in the allosteric regulator-binding site of pyruvate kinase isoform PykA from  
906 *Pseudomonas aeruginosa*. *J Biol Chem* 294:15505–15516.
- 907 24. Medina V, Pontarollo R, Glaeske D, Tabel H, Goldie H. 1990. Sequence of the *pckA* gene of  
908 *Escherichia coli* K-12: relevance to genetic and allosteric regulation and homology of *E. coli*  
909 phosphoenolpyruvate carboxykinase with the enzymes from *Trypanosoma brucei* and  
910 *Saccharomyces cerevisiae*. *J Bacteriol* 172:7151–7156.
- 911 25. Sauer U, Eikmanns BJ. 2005. The PEP-pyruvate-oxaloacetate node as the switch point for  
912 carbon flux distribution in bacteria. *FEMS Microbiol Rev* 29:765–794.
- 913 26. Crousilles A, Dolan SK, Brear P, Chirgadze DY, Welch M. 2018. Gluconeogenic precursor  
914 availability regulates flux through the glyoxylate shunt in *Pseudomonas aeruginosa*. *J Biol*  
915 *Chem* 293:14260–14269.
- 916 27. Dolan SK, Kohlstedt M, Trigg S, Vallejo Ramirez P, Kaminski CF, Wittmann C, Welch M. 2020.  
917 Contextual Flexibility in *Pseudomonas aeruginosa* Central Carbon Metabolism during Growth  
918 in Single Carbon Sources. *mBio* 11.

- 919 28. Kell DB, Peck MW, Rodger G, Morris JG. 1981. On the permeability to weak acids and bases of  
920 the cytoplasmic membrane of *Clostridium pasteurianum*. *Biochemical and Biophysical*  
921 *Research Communications* 99:81–88.
- 922 29. Baronofsky JJ, Schreurs WJA, Kashket ER. 1984. Uncoupling by Acetic Acid Limits Growth of  
923 and Acetogenesis by *Clostridium thermoaceticum*. *Applied and Environmental Microbiology*  
924 48:1134–1139.
- 925 30. Jacob K, Rasmussen A, Tyler P, Servos MM, Sylla M, Prado C, Daniele E, Sharp JS, Purdy AE.  
926 2017. Regulation of acetyl-CoA synthetase transcription by the CrbS/R two-component  
927 system is conserved in genetically diverse environmental pathogens. *PLoS One* 12:e0177825.
- 928 31. Gimenez R, Nuñez MF, Badía J, Aguilar J, Baldoma L. 2003. The Gene *yjcG*, Cotranscribed with  
929 the Gene *acs*, Encodes an Acetate Permease in *Escherichia coli*. *Journal of Bacteriology*  
930 185:6448.
- 931 32. Lundgren BR, Villegas-Peñaranda LR, Harris JR, Mottern AM, Dunn DM, Boddy CN, Nomura  
932 CT. 2014. Genetic analysis of the assimilation of C5-Dicarboxylic acids in *Pseudomonas*  
933 *aeruginosa* PAO1. *Journal of Bacteriology* 196:2543–2551.
- 934 33. Valentini M, Storelli N, Lapouge K. 2011. Identification of C 4-dicarboxylate transport systems  
935 in *Pseudomonas aeruginosa* PAO1. *Journal of Bacteriology* 193:4307–4316.
- 936 34. Nikel PI, Pérez-Pantoja D, de Lorenzo V. 2016. Pyridine nucleotide transhydrogenases enable  
937 redox balance of *Pseudomonas putida* during biodegradation of aromatic compounds.  
938 *Environmental Microbiology* 18:3565–3582.
- 939 35. Massey LK, Sokatch JR, Conrad RS. 1976. Branched chain amino acid catabolism in bacteria.  
940 *Bacteriological Reviews*. American Society for Microbiology (ASM)  
941 <https://doi.org/10.1128/membr.40.1.42-54.1976>.
- 942 36. Steeles MI, Lorenz D, Hatter K, Parkt A, Sokatch JR. 1992. Characterization of the *mmsAB*  
943 Operon of *Pseudomonas aeruginosa* P A O Encoding Methylmalonate-semialdehyde  
944 Dehydrogenase and 3-Hydroxyisobutyrate Dehydrogenase\*.
- 945 37. Cherrington CA, Hinton M, Mead GC, Chopra I. 1991. Organic acids: chemistry, antibacterial  
946 activity and practical applications. *Adv Microb Physiol* 32:87–108.
- 947 38. Horwill AR, Dudding AR, Escalante-Semerena JC. 2001. Studies of Propionate Toxicity in  
948 *Salmonella enterica* Identify 2-Methylcitrate as a Potent Inhibitor of Cell Growth. *Journal of*  
949 *Biological Chemistry* 276:19094–19101.
- 950 39. Brock M, Buckel W. 2004. On the mechanism of action of the antifungal agent propionate.  
951 *European Journal of Biochemistry* 271:3227–3241.
- 952 40. Simanshu DK, Satheshkumar PS, Savithri HS, Murthy MRN. 2003. Crystal structure of  
953 *Salmonella typhimurium* 2-methylisocitrate lyase (PrpB) and its complex with pyruvate and  
954 Mg<sup>2+</sup>. *Biochemical and Biophysical Research Communications* 311:193–201.
- 955 41. Reddick JJ, Sirkisoon S, Dahal RA, Hardesty G, Hage NE, Booth WT, Quattlebaum AL, Mills SN,  
956 Meadows VG, Adams SLH, Doyle JS, Kiel BE. 2017. First Biochemical Characterization of a  
957 Methylcitric Acid Cycle from *Bacillus subtilis* Strain 168. *Biochemistry* 56:5698–5711.



- 958 42. Gerike U, Hough DW, Russell NJ, Dyall-Smith ML, Danson MJ. 1998. Citrate synthase and 2-  
959 methylcitrate synthase: structural, functional and evolutionary relationships. *Microbiology (N*  
960 *Y)* 144:929–935.
- 961 43. Horswill AR, Escalante-semerena JC. 1999. Salmonella typhimurium LT2 Catabolizes  
962 Propionate via the 2-Methylcitric Acid Cycle Salmonella typhimurium LT2 Catabolizes  
963 Propionate via the 2-Methylcitric Acid Cycle 181:5615–5623.
- 964 44. Maurus R, Nguyen NT, Stokell DJ, Ayed A, Hultin PG, Duckworth HW, Brayer GD. 2003.  
965 Insights into the evolution of allosteric properties. The NADH binding site of hexameric type II  
966 citrate synthases. *Biochemistry* 42:5555–5565.
- 967 45. Chittori S, Savithri HS, Murthy MRN. 2011. Crystal structure of Salmonella typhimurium 2-  
968 methylcitrate synthase: Insights on domain movement and substrate specificity. *Journal of*  
969 *Structural Biology* 174:58–68.
- 970 46. Rocco CJ, Escalante-Semerena JC. 2010. In Salmonella enterica, 2-methylcitrate blocks  
971 gluconeogenesis. *J Bacteriol* 192:771–8.
- 972 47. Bernhard SA, MacQuarrie RA. 1973. Half-site reactivity and the “induced-fit” hypothesis.  
973 *Journal of Molecular Biology* 74:73–78.
- 974 48. Donald LJ, Molgat GF, Duckworth HW. 1989. Cloning, sequencing, and expression of the gene  
975 for NADH-sensitive citrate synthase of Pseudomonas aeruginosa. *Journal of Bacteriology*  
976 171:5542–5550.
- 977 49. Wiegand G, Remington S, Deisenhofer J, Huber R. 1984. Crystal structure analysis and  
978 molecular model of a complex of citrate synthase with oxaloacetate and S-acetyl-  
979 coenzyme A. *J Mol Biol* 174:205–219.
- 980 50. Remington S, Wiegand G, Huber R. 1982. Crystallographic refinement and atomic models of  
981 two different forms of citrate synthase at 2.7 and 1.7 Å resolution. *Journal of Molecular*  
982 *Biology* 158:111–152.
- 983 51. Serafini A, Tan L, Horswell S, Howell S, Greenwood DJ, Hunt DM, Phan MD, Schembri M,  
984 Monteleone M, Montague CR, Britton W, Garza-Garcia A, Snijders AP, VanderVen B, Gutierrez  
985 MG, West NP, de Carvalho LPS. 2019. Mycobacterium tuberculosis requires glyoxylate shunt  
986 and reverse methylcitrate cycle for lactate and pyruvate metabolism. *Molecular Microbiology*  
987 112:1284–1307.
- 988 52. Behrends V, Bell TJ, Liebeke M, Cordes-Blauert A, Ashraf SN, Nair C, Zlosnik JEA, Williams HD,  
989 Bundy JG. 2013. Metabolite profiling to characterize disease-related bacteria: Gluconate  
990 excretion by pseudomonas aeruginosa mutants and clinical isolates from cystic fibrosis  
991 patients. *Journal of Biological Chemistry* 288:15098–15109.
- 992 53. Kretzschmar U, Khodaverdi V, Adrian L. 2010. Transcriptional regulation of the acetyl-CoA  
993 synthetase gene *acsA* in Pseudomonas aeruginosa. *Arch Microbiol* 192:685–690.
- 994 54. Badal D, Jayarani AV, Kollaran MA, Prakash D, P M, Singh V. 2021. Foraging Signals Promote  
995 Swarming in Starving Pseudomonas aeruginosa. *mBio* [https://doi.org/10.1128/MBIO.02033-](https://doi.org/10.1128/MBIO.02033-21)  
996 21.
- 997 55. Rojo F. 2010. Carbon catabolite repression in Pseudomonas: optimizing metabolic versatility  
998 and interactions with the environment. *FEMS Microbiology Reviews* 34:658–684.

- 999 56. Sonnleitner E, Valentini M, Wenner N, Haichar F el Z, Haas D, Lapouge K. 2012. Novel Targets  
1000 of the CbrAB/Crc Carbon Catabolite Control System Revealed by Transcript Abundance in  
1001 *Pseudomonas aeruginosa*. *PLoS ONE* 7:e44637.
- 1002 57. Lord DM, Uzgoren Baran A, Soo VWC, Wood TK, Peti W, Page R. 2014. McbR/YncC:  
1003 Implications for the mechanism of ligand and DNA binding by a bacterial gntR transcriptional  
1004 regulator involved in biofilm formation. *Biochemistry* 53:7223–7231.
- 1005 58. Plassmeier J, Persicke M, Pühler A, Sterthoff C, Rückert C, Kalinowski J. 2012. Molecular  
1006 characterization of PrpR, the transcriptional activator of propionate catabolism in  
1007 *Corynebacterium glutamicum*. *Journal of Biotechnology* 159:1–11.
- 1008 59. Lee SK, Keasling JD. 2005. A Propionate-Inducible Expression System for Enteric Bacteria  
1009 Downloaded from. *APPLIED AND ENVIRONMENTAL MICROBIOLOGY* 71:6856–6862.
- 1010 60. Tang S, Hicks ND, Cheng YS, Silva A, Fortune SM, Sacchettini JC. 2019. Structural and  
1011 functional insight into the *Mycobacterium tuberculosis* protein PrpR reveals a novel type of  
1012 transcription factor. *Nucleic Acids Research* 47:9934–9949.
- 1013 61. Varadi M, Anyango S, Deshpande M, Nair S, Natassia C, Yordanova G, Yuan D, Stroe O, Wood  
1014 G, Laydon A, Židek A, Green T, Tunyasuvunakool K, Petersen S, Jumper J, Clancy E, Green R,  
1015 Vora A, Lutfi M, Figurnov M, Cowie A, Hobbs N, Kohli P, Kleywegt G, Birney E, Hassabis D,  
1016 Velankar S. 2022. AlphaFold Protein Structure Database: massively expanding the structural  
1017 coverage of protein-sequence space with high-accuracy models. *Nucleic Acids Research*  
1018 50:D439–D444.
- 1019 62. Jumper J, Evans R, Pritzel A, Green T, Figurnov M, Ronneberger O, Tunyasuvunakool K, Bates  
1020 R, Židek A, Potapenko A, Bridgland A, Meyer C, Kohl SAA, Ballard AJ, Cowie A, Romera-  
1021 Paredes B, Nikolov S, Jain R, Adler J, Back T, Petersen S, Reiman D, Clancy E, Zielinski M,  
1022 Steinegger M, Pacholska M, Berghammer T, Bodenstein S, Silver D, Vinyals O, Senior AW,  
1023 Kavukcuoglu K, Kohli P, Hassabis D. 2021. Highly accurate protein structure prediction with  
1024 AlphaFold. *Nature* 2021 596:7873 596:583–589.
- 1025 63. Tummler K, Zimmermann M, Schubert OT, Aebersold R, Kühn C, Sauer U, Klipp E. 2018. Two  
1026 parallel pathways implement robust propionate catabolism and detoxification in  
1027 mycobacteria. *bioRxiv* 258947.
- 1028 64. VanderVen BC, Fahey RJ, Lee W, Liu Y, Abramovitch RB, Memmott C, Crowe AM, Eltis LD,  
1029 Perola E, Deininger DD, Wang T, Locher CP, Russell DG. 2015. Novel Inhibitors of Cholesterol  
1030 Degradation in *Mycobacterium tuberculosis* Reveal How the Bacterium’s Metabolism Is  
1031 Constrained by the Intracellular Environment. *PLOS Pathogens* 11:e1004679.
- 1032 65. Poulsen BE, Yang R, Clatworthy AE, White T, Osmulski SJ, Li L, Penaranda C, Lander ES,  
1033 Shores N, Hung DT. 2019. Defining the core essential genome of *Pseudomonas aeruginosa*.  
1034 *Proc Natl Acad Sci U S A* 116:10072–10080.
- 1035 66. Turner KH, Wessel AK, Palmer GC, Murray JL, Whiteley M. 2015. Essential genome of  
1036 *Pseudomonas aeruginosa* in cystic fibrosis sputum. *Proc Natl Acad Sci U S A* 112:4110–5.
- 1037 67. Lopatkin AJ, Bening SC, Manson AL, Stokes JM, Kohanski MA, Badran AH, Earl AM, Cheney NJ,  
1038 Yang JH, Collins JJ. 2021. Clinically relevant mutations in core metabolic genes confer  
1039 antibiotic resistance. *Science* 371.

- 1040 68. Gil-Gil T, Corona F, Martínez JL, Bernardini A. 2020. The Inactivation of Enzymes Belonging to  
1041 the Central Carbon Metabolism Is a Novel Mechanism of Developing Antibiotic Resistance.  
1042 *mSystems* 5.
- 1043 69. Murima P, McKinney JD, Pethe K. 2014. Targeting bacterial central metabolism for drug  
1044 development. *Chem Biol* 21:1423–1432.
- 1045 70. Guzmán GI, Utrilla J, Nurk S, Brunk E, Monk JM, Ebrahim A, Pálsson BO, Feist AM. 2015.  
1046 Model-driven discovery of underground metabolic functions in *Escherichia coli*. *Proc Natl*  
1047 *Acad Sci U S A* 112:929–934.
- 1048 71. Stover CK, Pham XQ, Erwin AL, Mizoguchi SD, Warrener P, Hickey MJ, Brinkman FSL, Hufnagle  
1049 WO, Kowalik DJ, Lagrou M, Garber RL, Goltry L, Tolentino E, Westbrook-Wadman S, Yuan Y,  
1050 Brody LL, Coulter SN, Folger KR, Kas A, Larbig K, Lim R, Smith K, Spencer D, Wong GK-S, Wu Z,  
1051 Paulsen IT, Reizer J, Saier MH, Hancock REW, Lory S, Olson M V. 2000. Complete genome  
1052 sequence of *Pseudomonas aeruginosa* PAO1, an opportunistic pathogen. *Nature* 406:959–  
1053 964.
- 1054 72. LaBauve AE, Wargo MJ. 2012. Growth and laboratory maintenance of *Pseudomonas*  
1055 *aeruginosa*. *Curr Protoc Microbiol* Chapter 6:Unit 6E.1.
- 1056 73. Berger A, Dohnt K, Tielen P, Jahn D, Becker J, Wittmann C. 2014. Robustness and Plasticity of  
1057 Metabolic Pathway Flux among Uropathogenic Isolates of *Pseudomonas aeruginosa*. *PLoS*  
1058 *ONE* 9:e88368.
- 1059 74. Bolger AM, Lohse M, Usadel B. 2014. Trimmomatic: a flexible trimmer for Illumina sequence  
1060 data. *Bioinformatics* 30:2114–2120.
- 1061 75. Liao Y, Smyth GK, Shi W. 2019. The R package Rsubread is easier, faster, cheaper and better  
1062 for alignment and quantification of RNA sequencing reads. *Nucleic Acids Research* 47.
- 1063 76. Love MI, Huber W, Anders S. 2014. Moderated estimation of fold change and dispersion for  
1064 RNA-seq data with DESeq2. *Genome Biology* 15:550.
- 1065 77. Gatto L, Lilley KS. 2012. MSnbase-an R/Bioconductor package for isobaric tagged mass  
1066 spectrometry data visualization, processing and quantitation. *Bioinformatics* 28:288–289.
- 1067 78. Smyth GK. 2005. limma: Linear Models for Microarray Data, p. 397–420. *In* *Bioinformatics and*  
1068 *Computational Biology Solutions Using R and Bioconductor*. Springer-Verlag, New York.
- 1069 79. Benjamini Y, Hochberg Y. 1995. Controlling the False Discovery Rate: A Practical and Powerful  
1070 Approach to Multiple Testing. *Journal of the Royal Statistical Society Series B*  
1071 (Methodological). WileyRoyal Statistical Society <https://doi.org/10.2307/2346101>.
- 1072 80. Robinson JT, Thorvaldsdóttir H, Winckler W, Guttman M, Lander ES, Getz G, Mesirov JP. 2011.  
1073 Integrative genomics viewer. *Nature Biotechnology* 29:1 29:24–26.
- 1074 81. Huang W, Wilks A. 2017. A rapid seamless method for gene knockout in *Pseudomonas*  
1075 *aeruginosa*. *BMC Microbiol* 17:199.
- 1076 82. Choi K-H, Schweizer HP. 2006. mini-Tn7 insertion in bacteria with single attTn7 sites: example  
1077 *Pseudomonas aeruginosa*. *Nature Protocols* 1:153–161.

- 1078 83. Heath Damron F, McKenney ES, Barbier M, Liechti GW, Goldberg JB. 2013. Construction of  
1079 Mobilizable Mini-Tn7 Vectors for Bioluminescent Detection and Single Copy Promoter lux  
1080 Reporter Analysis in Gram-Negative Bacteria. CAMBRIDGE UNIVERSITY LIBRARY  
1081 <https://doi.org/10.1128/AEM.00640-13>.
- 1082 84. Wittmann C. 2007. Fluxome analysis using GC-MS. *Microb Cell Fact* 6:6.
- 1083 85. Kind S, Becker J, Wittmann C. 2013. Increased lysine production by flux coupling of the  
1084 tricarboxylic acid cycle and the lysine biosynthetic pathway—Metabolic engineering of the  
1085 availability of succinyl-CoA in *Corynebacterium glutamicum*. *Metabolic Engineering* 15:184–  
1086 195.
- 1087 86. Nikel PI, Chavarría M, Fuhrer T, Sauer U, De Lorenzo V. 2015. *Pseudomonas putida* KT2440  
1088 strain metabolizes glucose through a cycle formed by enzymes of the Entner-Doudoroff,  
1089 embden-meyerhof-parnas, and pentose phosphate pathways. *Journal of Biological Chemistry*  
1090 290:25920–25932.
- 1091 87. Rivers DB, Blevins WT. 1987. Multiple Enzyme Forms of Glyceraldehyde-3-phosphate  
1092 Dehydrogenase in *Pseudomonas aeruginosa* PAO. *Microbiology (N Y)* 133:3159–3164.
- 1093 88. Görisch H, Jeoung J-H, Rückert A, Kretzschmar U. 2002. Malate:quinone oxidoreductase is  
1094 essential for growth on ethanol or acetate in *Pseudomonas aeruginosa*. *Microbiology (N Y)*  
1095 148:3839–3847.
- 1096 89. Bartell JA, Blazier AS, Yen P, Thøgersen JC, Jelsbak L, Goldberg JB, Papin JA. 2017.  
1097 Reconstruction of the metabolic network of *Pseudomonas aeruginosa* to interrogate  
1098 virulence factor synthesis. *Nature Communications* 8:14631.
- 1099 90. Bartell JA, Blazier AS, Yen P, Thøgersen JC, Jelsbak L, Goldberg JB, Papin JA. 2017.  
1100 Reconstruction of the metabolic network of *Pseudomonas aeruginosa* to interrogate  
1101 virulence factor synthesis. *Nature Communications* 8:14631.
- 1102 91. Kretzschmar U, Schobert M, Görisch H. 2001. The *Pseudomonas aeruginosa* *acsA* gene,  
1103 encoding an acetyl-CoA synthetase, is essential for growth on ethanol. *Microbiology (N Y)*  
1104 147:2671–2677.
- 1105 92. Hardy GPMA, Joost Teixeira de Mattos M, Neijssel OM. 1993. Energy conservation by  
1106 pyrroloquinoline quinol-linked xylose oxidation in *Pseudomonas putida* NCTC 10936 during  
1107 carbon-limited growth in chemostat culture. *FEMS Microbiology Letters* 107:107–110.
- 1108 93. Yuan Q, Huang T, Li P, Hao T, Li F, Ma H, Wang Z, Zhao X, Chen T, Goryanin I. 2017. Pathway-  
1109 Consensus Approach to Metabolic Network Reconstruction for *Pseudomonas putida* KT2440  
1110 by Systematic Comparison of Published Models. *PLOS ONE* 12:e0169437.
- 1111 94. van Duuren JB, Puchałka J, Mars AE, Bücker R, Eggink G, Wittmann C, dos Santos VAM. 2013.  
1112 Reconciling in vivo and in silico key biological parameters of *Pseudomonas putida*KT2440  
1113 during growth on glucose under carbon-limited condition. *BMC Biotechnology* 13:93.
- 1114 95. van Duuren JB, Puchałka J, Mars AE, Bücker R, Eggink G, Wittmann C, dos Santos VAM. 2013.  
1115 Reconciling in vivo and in silico key biological parameters of *Pseudomonas putida*KT2440  
1116 during growth on glucose under carbon-limited condition. *BMC Biotechnology* 13:93.
- 1117 96. Srere PA, Brazil H, Gonen L. 1963. The Citrate Condensing Enzyme of Pigeon Breast Muscle  
1118 and Moth Flight Muscle. *ACTA Chemica Scandinavica*.

- 1119 97. Winter G. 2010. Xia2: An expert system for macromolecular crystallography data reduction.  
1120 Journal of Applied Crystallography 43:186–190.
- 1121 98. McCoy AJ, Grosse-Kunstleve RW, Adams PD, Winn MD, Storoni LC, Read RJ. 2007. Phaser  
1122 crystallographic software. Journal of Applied Crystallography 40:658–674.
- 1123 99. Murshudov GN, Skubák P, Lebedev AA, Pannu NS, Steiner RA, Nicholls RA, Winn MD, Long F,  
1124 Vagin AA. 2011. REFMAC5 for the refinement of macromolecular crystal structures. Acta  
1125 Crystallographica Section D: Biological Crystallography 67:355–367.
- 1126 100. Moriarty NW, Headd JJ, Grosse-Kunstleve RW, Afonine P V., Zwart PH, Urzhumtsev A,  
1127 Terwilliger TC, Echols N, Adams PD, Mustyakimov M. 2012. Towards automated  
1128 crystallographic structure refinement with phenix.refine . Acta Crystallographica Section D  
1129 Biological Crystallography 68:352–367.
- 1130 101. Emsley P, Cowtan K. 2004. Coot: Model-building tools for molecular graphics. Acta  
1131 Crystallographica Section D: Biological Crystallography 60:2126–2132.
- 1132 102. Winter G. 2010. Xia2: An expert system for macromolecular crystallography data reduction.  
1133 Journal of Applied Crystallography 43:186–190.
- 1134 103. Murshudov GN, Skubák P, Lebedev AA, Pannu NS, Steiner RA, Nicholls RA, Winn MD, Long F,  
1135 Vagin AA. 2011. REFMAC5 for the refinement of macromolecular crystal structures. Acta  
1136 Crystallographica Section D: Biological Crystallography 67:355–367.
- 1137 104. Moriarty NW, Headd JJ, Grosse-Kunstleve RW, Afonine P V., Zwart PH, Urzhumtsev A,  
1138 Terwilliger TC, Echols N, Adams PD, Mustyakimov M. 2012. Towards automated  
1139 crystallographic structure refinement with phenix.refine . Acta Crystallographica Section D  
1140 Biological Crystallography 68:352–367.
- 1141 105. Emsley P, Cowtan K. 2004. Coot: Model-building tools for molecular graphics. Acta  
1142 Crystallographica Section D: Biological Crystallography 60:2126–2132.
- 1143 106. Gläser L, Kuhl M, Jovanovic S, Fritz M, Vögeli B, Erb TJ, Becker J, Wittmann C. 2020. A  
1144 common approach for absolute quantification of short chain CoA thioesters in prokaryotic  
1145 and eukaryotic microbes. Microbial Cell Factories 2020 19:1 19:1–13.

1146

1147

1148

1149

## 1150 **Figure Legends**

1151 **Figure 1; Proteomic analysis of Pa grown on Succinate and Propionate**

1152 **A**; Schematic depicting the Pa 2-methylcitrate cycle (2MCC) in Pa central carbon  
1153 metabolism. The Pa central metabolic network shown here consists of six main blocks,  
1154 designated with different colours: (i) the Embden-Meyerhoff-Parnas pathway (EMP,  
1155 orange); (ii) the pentose phosphate pathway (PPP, green); (iii) the Entner-Doudoroff  
1156 pathway (EDP, purple); (iv) the tricarboxylic acid cycle (TCA, blue) and glyoxylate shunt (red);  
1157 (v) anaplerotic and gluconeogenic reactions (yellow), and (vi) the 2MCC (pink). The 2MCC  
1158 operon arrangement (inset – grey underline) consists of genes which encode; a  
1159 transcriptional regulator (designated here as *prpR*) which is thought to encode a ligand-  
1160 responsive repressor, a methylcitrate synthase (*prpC*) which condenses propionyl-CoA  
1161 (PrCoA) with oxaloacetate (OAA) to form 2-methylcitrate (2-MC), a 2-methylcitrate  
1162 dehydratase/hydratase (*prpD*) which dehydrates 2-MC to yield 2-methylnaconitate (2-MCA),  
1163 a 2-methylcitrate dehydratase (*acnD*) and 2-methylnaconitate *cis-trans* isomerase (*prpF*)  
1164 which provide an alternative route for the generation of 2-MCA from 2-MC, and a 2-  
1165 methylisocitrate lyase (*prpB*), which cleaves 2-methylisocitrate (2-MIC) to yield pyruvate  
1166 (PYR) and succinate (SUC). Note that the 2-MCA generated in the PrpD or AcnD/PrpF  
1167 reactions is rehydrated by an unlinked aconitase (likely AcnB in Pa) to yield the PrpB  
1168 substrate, 2-MIC. Also, the enzyme responsible for the initial activation of propionate to  
1169 yield PrCoA has not yet been identified for Pa, although in other organisms this function is  
1170 carried out by a dedicated propionyl-CoA synthase (PrpE), or by acetyl-CoA synthase (AcsA),  
1171 or by a combination of phosphotransacetylase (Pta) and acetate kinase (AckA) activities.  
1172 Other abbreviations; AcCoA, acetyl-coenzyme A; CIT, citrate; ICIT, *isocitrate*; AKG,  $\alpha$ -  
1173 ketoglutarate; FUM, fumarate; MAL, malate; KDPG, 2-keto-3-deoxy-6-phosphogluconate;  
1174 G3P, glyceraldehyde 3-phosphate; FBP, fructose 1,6-*bis*phosphate; F6P, fructose 6-  
1175 phosphate; G6P, glucose 6-phosphate; 6PG, 6-phosphogluconate; Ri5P, ribulose 5-

1176 phosphate; R5P, ribose 5-phosphate; X5P, xylulose 5-phosphate; S7P, sedoheptulose 7-  
1177 phosphate; E4P, erythrose 4-phosphate; PEP, phospho*eno*lpyruvate.

1178 **B**; Illustration of the statistically significant proteomic changes ( $p$ -value  $\leq 0.05$ , fold change  
1179  $\geq 1$  or  $\leq -1$ ) during growth on propionate or succinate, as represented by Voronoi  
1180 tessellations. Pathway assignment was performed using the Kyoto Encyclopedia of Genes  
1181 and Genomes (KEGG) dataset. Proteome alterations which could not be assigned to a  
1182 specific pathway (uncharacterised/hypothetical proteins) are shown as 'Not Mapped'. The  
1183 specific protein identities for the protein clusters that were up-regulated during growth on  
1184 propionate are shown in **Figure S1A** and statistical analyses of these data are illustrated in  
1185 **Figures S1B-D**. The complete proteomics dataset is presented in **File S1**.

1186

1187 **Figure 2; *In vivo* carbon flux distributions in central metabolism of Pa PAO1 during growth**  
1188 **on succinate (A) or propionate (B) as sole carbon sources.** Flux is expressed as a molar  
1189 percentage of the average uptake rate for succinate ( $23.5 \text{ mmol g}^{-1} \text{ h}^{-1}$ ) or propionate  $28.1$   
1190  $\text{mmol g}^{-1} \text{ h}^{-1}$ ), calculated from the individual rates in **File S2**. Anabolic pathways from 11  
1191 precursors to biomass are indicated by the filled blue triangles. The flux distributions with  
1192 bidirectional resolution (i.e., net and exchange fluxes), including the drain from metabolic  
1193 intermediates to biomass and confidence intervals of the flux estimates, are provided in **File**  
1194 **S2**. The errors given for each flux reflect the corresponding 90% confidence intervals. The  
1195 full flux datasets are presented in *Supporting Information File S2*. Colours qualitatively  
1196 indicate fluxomic correlation with changes on the protein level during growth on propionate  
1197 compared with growth on succinate (light green or red  $\rightarrow$  significant up- or down-regulation  
1198 (respectively); dark green or red  $\rightarrow$  less significant up- or down-regulation).

1199

1200 **Figure 3; The Pa ORF (*prpC*) encoding 2-methylcitrate synthase is essential for growth on**  
1201 **propionate. A;** Wild-type Pa (PAO1), and the  $\Delta acsA$ ,  $\Delta aceA$  and  $\Delta prpC$  mutants all grow  
1202 comparably on MOPS agar containing glucose or succinate as a sole carbon source.  $\Delta acsA$   
1203 has a growth defect during growth on MOPS-acetate and MOPS-propionate.  $\Delta prpC$  cannot  
1204 grow on MOPS propionate. The plates were photographed after 24 h incubation. **B;** Wild-  
1205 type PAO1 and the  $\Delta acsA$ ,  $\Delta aceA$  and  $\Delta prpC$  mutants were cultured on LB agar containing an  
1206 increasing concentration of propionate (0, 5, 10, 20 mM, as indicated). The  $\Delta prpC$  displays a  
1207 pronounced growth defect in the presence of propionate concentrations > 10 mM. The  
1208 plates were photographed after 24 h incubation. **C;** Intracellular propionyl-CoA  
1209 concentration in wild-type Pa (PAO1) and in the  $\Delta prpC$  mutant following 3h exposure to  
1210 propionate (5 mM). Unpaired *t*-test with Welch's correction  $p = 0.0026$ . The experiment was  
1211 performed using biological triplicates. **D;** Illustration of the interwoven reactions for  
1212 propionate and acetate activation in Pa, feeding into the 2-methylcitrate cycle and TCA  
1213 cycle, respectively. Following uptake, acetate and propionate are activated by AcsA. The  
1214 resulting propionyl-CoA (PrCoA) is condensed with oxaloacetate (OAA) in a PrpC-catalyzed  
1215 reaction to form 2-methylcitrate (2-MC), whereas the acetyl-CoA (AcCoA) is condensed with  
1216 oxaloacetate in a GltA-catalyzed reaction to form citrate (CIT). **E;** Growth of the Pa  
1217 glyoxylate shunt mutants  $\Delta aceA$  and  $\Delta glcB$  is blocked on MOPS agar plates containing a  
1218 combination of high acetate concentration (40 mM) and low propionate concentration (5  
1219 mM) as the carbon source. However, this growth inhibition is partially overcome by  
1220 increasing the propionate concentration to 20 mM (left to right in the figure). The plates  
1221 were photographed after 48 h growth. The data are representative of two independent  
1222 experiments, each performed in triplicate.



1223

1224 **Figure 4; Biochemical and structural analysis of PrpC and GltA from Pa.**

1225 **A.** A  $\Delta gltA$  mutant exhibits a growth defect when cultured on LB-agar, whereas a  $\Delta prpC$   
1226 mutant displays a wild-type colony morphotype. The plates were photographed after 48 h.  
1227 The data are representative of two independent experiments, each performed in triplicate.

1228 **B.** Purified PrpC<sub>Pa</sub> exhibits both citrate synthase activity (with acetyl-CoA as a substrate) and  
1229 2-methylcitrate synthase activity (with propionyl-CoA as a substrate). The concentration of  
1230 OAA in each reaction was fixed at 0.5 mM. The data are representative of two independent  
1231 experiments, each performed in triplicate.

1232 **C.** Purified GltA<sub>Pa</sub> is a citrate synthase with no detectable 2-methylcitrate synthase activity.  
1233 The concentration of OAA was fixed at 0.5 mM. The data are representative of two  
1234 independent experiments, each performed in triplicate.

1235 **D.** The x-ray crystal structure of PrpC<sub>Pa</sub> (PDB: 6S6F). PrpC<sub>Pa</sub> is a homodimer. In the ribbon  
1236 diagram shown, the protomers are coloured blue and grey.

1237 **E.** Cartoon representation of the GltA<sub>Pa</sub> hexamer in the asymmetric unit (left) and, for  
1238 comparison with PrpC<sub>Pa</sub>, the extracted GltA<sub>Pa</sub> dimers (middle and right).

1239 **F.** Superposition of the PrpC<sub>Pa</sub> and GltA<sub>Pa</sub> structures. PrpC<sub>Pa</sub> and GltA<sub>Pa</sub> share similar core  $\alpha$ -  
1240 helical folds (shown in grey to highlight similarities). However, GltA<sub>Pa</sub> has an additional  
1241 antiparallel  $\beta$ -sheet at its N-terminus (coloured in red to showcase differences).

1242

1243 **Figure 5; Structural analysis of oxaloacetate-bound PrpC<sub>Pa</sub>.**

1244 **A;** Crystal structure of oxaloacetate-bound PrpC<sub>Pa</sub> represented in cartoon (PDB: 6S87). One  
1245 protomer is coloured blue and the other orange. A 90° rotation about the X-axis is shown  
1246 (right). Oxaloacetate is shown as green and red spheres.

1247 **B;** Oxaloacetate binding site from *P. aeruginosa* PrpC chain D. Water molecules are shown in  
1248 cyan spheres. Chain D and chain C residues are shown in orange and cyan, respectively. The  
1249 electron density map ( $2F_o - F_c$ ) in white is contoured at  $1.5\sigma$ .

1250 **C;** Superposition of the PrpC<sub>Pa</sub> (white), GltA<sub>Pa</sub> (pink) and *A. fumigatus* PrpC (5UQR) (green)  
1251 oxaloacetate binding site. Oxaloacetate is shown in orange spheres. Most of the amino acid  
1252 residues forming this site are conserved, except R307 (GltA<sub>Pa</sub> numbering).

1253 **D;** The left-hand panel shows the open (red) apo-conformation of PrpC<sub>Pa</sub>, the middle panel  
1254 shows the partially closed (blue) holo-conformation of PrpC<sub>Pa</sub>, and the right hand panel  
1255 shows a superposition of both conformations of PrpC<sub>Pa</sub>. Note the structural rearrangement  
1256 in the oxaloacetate-bound PrpC<sub>Pa</sub> protomer (indicated by the red arrow).

1257

1258 **Figure 6;** RNA-seq analysis uncovers that propionate exposure induces expression of the *prp*  
1259 operon and of the genes associated with branched chain amino acid catabolism in Pa.

1260 **A;** Schematic of the experimental design. At OD 0.2, 500  $\mu$ M sodium propionate was spiked  
1261 into (triplicate) cultures of PAO1 and the  $\Delta prpC$  mutant. An equal volume of H<sub>2</sub>O was added  
1262 to the control PAO1 and  $\Delta prpC$  mutant cultures (also grown in triplicate). The cultures were  
1263 harvested 2 h after the propionate addition, corresponding to an OD<sub>600</sub> of  $\cong$  0.6  
1264 (exponential growth) and RNA-seq analysis was carried out.

1265 **B;** The panel shows a volcano plot illustrating the log<sub>2</sub>-fold change in transcript abundance  
1266 versus adjusted *p*-values for wild-type PAO1 grown in MOPS-succinate versus wild-type

1267 PAO1 grown in MOPS-succinate + 500  $\mu$ M propionate. Transcripts which are significantly (q-  
1268 val < 0.05) increased (red) or decreased (blue) in abundance are indicated. Selected  
1269 transcripts are labelled.

1270 **C**; Western blot showing protein expression levels of PrpB (32.1 kDa) in PAO1, and in the  
1271  $\Delta prpC$  mutant, the  $\Delta gltA\_EVOL$  mutant, and the  $\Delta prpR$  mutant after exposure to 4 mM  
1272 propionate (+P) for 3 h. Isocitrate dehydrogenase (ICD – 45.6 kDa) served as loading control.  
1273 Note that the  $\Delta gltA\_EVOL$  and  $\Delta prpR$  mutants display constitutively active PrpB expression,  
1274 independent of propionate addition. Data representative of three independent  
1275 experiments.

1276 **D**; Growth of  $\Delta gltA$  and  $\Delta gltA\_EVOL1-3$  mutants compared with PAO1 in MOPS-acetate  
1277 medium. The data are representative of three independent experiments, each performed in  
1278 triplicate.

1279 **E**; AlphaFold model of PrpR with the locations of the residues mutated and/or deleted in the  
1280  $\Delta gltA\_EVOL1-3$  mutants highlighted. The winged helix-turn-helix (wHTH) motif and the  
1281 GntR family FadR C-terminal domain (FCD) are shown.

1282

1283 **Figure 7; Model for the operation of the 2MCC in Pa.**

1284 **A**; During growth in the absence of propionate or propionyl-CoA generating substrates, the  
1285 2MCC operon (*prp*) expression is repressed through the binding of PrpR to its upstream  
1286 promoter region. Incomplete repression of the operon (from basal cellular propionyl-CoA or  
1287 competing transcriptional activators) results in a basal, low level of *prpC* transcription.

1288 **B;** As the cellular propionyl-CoA levels rise, this metabolite is condensed with oxaloacetate  
1289 by PrpC, resulting in the formation of 2-MC. 2-MC likely then binds to PrpR, inducing  
1290 conformational changes which lead to the dissociation of PrpR from the DNA. This de-  
1291 represses the *prp* operon, allowing expression of the 2MCC enzymes. However, as the  
1292 concentration of propionyl-CoA falls (due to depletion of propionate or BCAAs due to 2MCC  
1293 activity) so too does the concentration of 2-MC, which, in turn, leads to re-binding of PrpR  
1294 to the *prp* promoter region and a resumption in *prp* operon repression.

1295 **C;** In the absence of citrate synthase (GltA), Pa can survive because of the low-level basal  
1296 expression of PrpC; a promiscuous enzyme that also has citrate synthase activity. However,  
1297 this low total citrate synthase activity is unable to meet cellular demand, resulting in a  
1298 severe growth defect and a strong selection pressure to acquire mutations that increase  
1299 *prpC* expression. Based on our work, it seems that mutations in *prpR* which abolish its  
1300 repressor activity are the most commonly-selected mechanism for achieving this. These  
1301 mutations lead to constitutive expression of the *prp* genes, and thus, an increase total  
1302 cellular citrate synthase activity (compensating for the loss of GltA activity).

1303

1304

1305

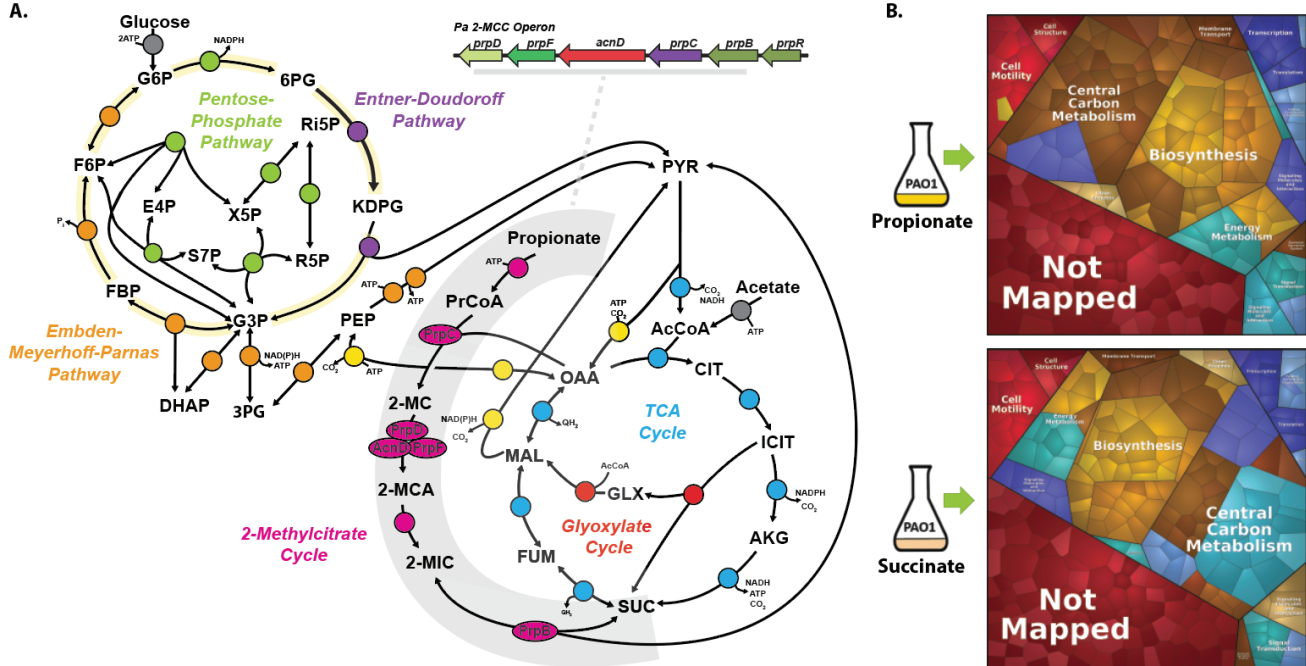

**Figure 1; Proteomic analysis of Pa grown on Succinate and Propionate**

**A;** Schematic depicting the Pa 2-methylcitrate cycle (2MCC) in Pa central carbon metabolism. The Pa central metabolic network shown here consists of six main blocks, designated with different colours: (i) the Embden-Meyerhoff-Parnas pathway (EMP, orange); (ii) the pentose phosphate pathway (PPP, green); (iii) the Entner-Doudoroff pathway (EDP, purple); (iv) the tricarboxylic acid cycle (TCA, blue) and glyoxylate shunt (red); (v) anaplerotic and gluconeogenic reactions (yellow), and (vi) the 2MCC (pink). The 2MCC operon arrangement (inset – grey underline) consists of genes which encode; a transcriptional regulator (designated here as *prpR*) which is thought to encode a ligand-responsive repressor, a methylcitrate synthase (*prpC*) which condenses propionyl-CoA (PrCoA) with oxaloacetate (OAA) to form 2-methylcitrate (2-MC), a 2-methylcitrate dehydratase/hydratase (*prpD*) which dehydrates 2-MC to yield 2-methylaconitate (2-MCA), a 2-methylcitrate dehydratase (*acnD*) and 2-methylaconitate cis-trans isomerase (*prpF*) which provide an alternative route for the generation of 2-MCA from 2-MC, and a 2-methylisocitrate lyase (*prpB*), which cleaves 2-methylisocitrate (2-MIC) to yield pyruvate (PYR) and succinate (SUC). Note that the 2-MCA generated in the PrpD or AcnD/PrpF reactions is rehydrated by an unlinked aconitase (likely AcnB in Pa) to yield the PrpB substrate, 2-MIC. Also, the enzyme responsible for the initial activation of propionate to yield PrCoA has not yet been identified for Pa, although in other organisms this function is carried out by a dedicated propionyl-CoA synthase (PrpE), or by acetyl-CoA synthase (AcsA), or by a combination of phosphotransacetylase (Pta) and acetate kinase (AckA) activities. Other abbreviations; AcCoA, acetyl-coenzyme A; CIT, citrate; ICIT, isocitrate; AKG,  $\alpha$ -ketoglutarate; FUM, fumarate; MAL, malate; KDPG, 2-keto-3-deoxy-6-phosphogluconate; G3P, glyceraldehyde 3-phosphate; FBP, fructose 1,6-bisphosphate; F6P, fructose 6-phosphate; G6P, glucose 6-phosphate; 6PG, 6-phosphogluconate; Ri5P, ribulose 5-phosphate; R5P, ribose 5-phosphate; X5P, xylulose 5-phosphate; S7P, sedoheptulose 7-phosphate; E4P, erythrose 4-phosphate; PEP, phosphoenolpyruvate.

**B;** Illustration of the statistically significant proteomic changes ( $p$ -value  $\leq 0.05$ , fold change  $\geq 1$  or  $\leq -1$ ) during growth on propionate or succinate, as represented by Voronoi tessellations. Pathway assignment was performed using the Kyoto Encyclopedia of Genes and Genomes (KEGG) dataset. Proteome alterations which could not be assigned to a specific pathway (uncharacterised/hypothetical proteins) are shown as 'Not Mapped'. The specific protein identities for the protein clusters that were up-regulated during growth on propionate are shown in Figure S1A and statistical analyses of these data are illustrated in Figures S1B-D. The complete proteomic dataset is presented in File S1.

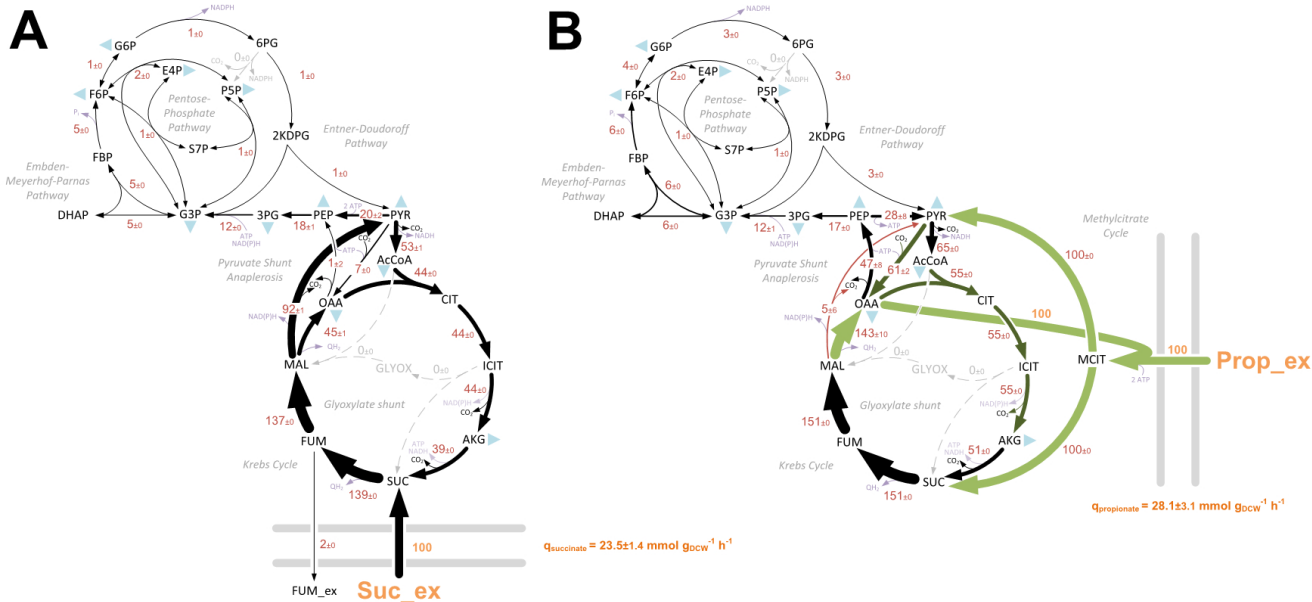

**Figure 2; In vivo carbon flux distributions in central metabolism of Pa PAO1 during growth on succinate (A) or propionate (B) as sole carbon sources.** Flux is expressed as a molar percentage of the average uptake rate for succinate ( $23.5 \text{ mmol g}^{-1} \text{ h}^{-1}$ ) or propionate ( $28.1 \text{ mmol g}^{-1} \text{ h}^{-1}$ ), calculated from the individual rates in File S2. Anabolic pathways from 11 precursors to biomass are indicated by the filled blue triangles. The flux distributions with bidirectional resolution (i.e., net and exchange fluxes), including the drain from metabolic intermediates to biomass and confidence intervals of the flux estimates, are provided in File S2. The errors given for each flux reflect the corresponding 90% confidence intervals. The full flux datasets are presented in Supporting Information File S2. Colours qualitatively indicate fluxomic correlation with changes on the protein level during growth on propionate compared with growth on succinate (light green or red = significant up- or down-regulation (respectively); dark green or red = less significant up- or down-regulation).

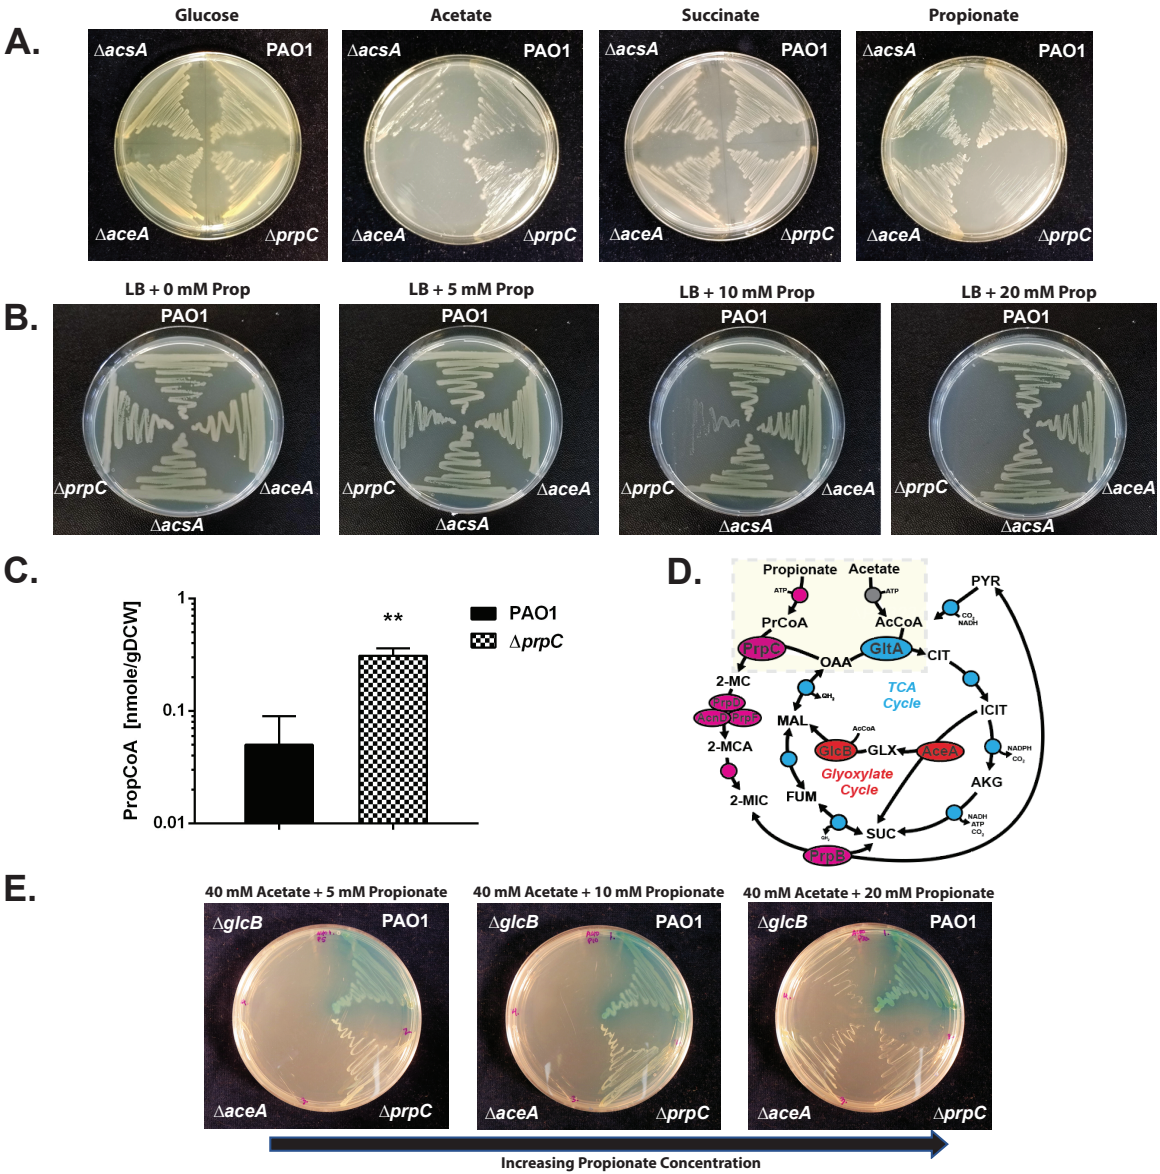

**Figure 3; The Pa ORF (*prpC*) encoding 2-methylcitrate synthase is essential for growth on propionate.** **A;** Wild-type Pa (PAO1), and the  $\Delta acsA$ ,  $\Delta aceA$  and  $\Delta prpC$  mutants all grow comparably on MOPS agar containing glucose or succinate as a sole carbon source.  $\Delta acsA$  has a growth defect during growth on MOPS-acetate and MOPS-propionate.  $\Delta prpC$  cannot grow on MOPS propionate. The plates were photographed after 24 h incubation. **B;** Wild-type PAO1 and the  $\Delta acsA$ ,  $\Delta aceA$  and  $\Delta prpC$  mutants were cultured on LB agar containing an increasing concentration of propionate (0, 5, 10, 20 mM, as indicated). The  $\Delta prpC$  displays a pronounced growth defect in the presence of propionate concentrations > 10 mM. The plates were photographed after 24 h incubation. **C;** Intracellular propionyl-CoA concentration in wild-type Pa (PAO1) and in the  $\Delta prpC$  mutant following 3h exposure to propionate (5 mM). Unpaired t-test with Welch's correction  $p = 0.0026$ . The experiment was performed using biological triplicates. **D;** Illustration of the interwoven reactions for propionate and acetate activation in Pa, feeding into the 2-methylcitrate cycle and TCA cycle, respectively. Following uptake, acetate and propionate are activated by *AcsA*. The resulting propionyl-CoA (PrCoA) is condensed with oxaloacetate (OAA) in a PrpC-catalyzed reaction to form 2-methylcitrate (2-MC), whereas the acetyl-CoA (AcCoA) is condensed with oxaloacetate in a GltA-catalyzed reaction to form citrate (CIT). **E;** Growth of the Pa glyoxylate shunt mutants  $\Delta aceA$  and  $\Delta glcB$  is blocked on MOPS agar plates containing a combination of high acetate concentration (40 mM) and low propionate concentration (5 mM) as the carbon source. However, this growth inhibition is partially overcome by increasing the propionate concentration to 20 mM (left to right in the figure). The plates were photographed after 48 h growth. The data are representative of two independent experiments, each performed in triplicate.

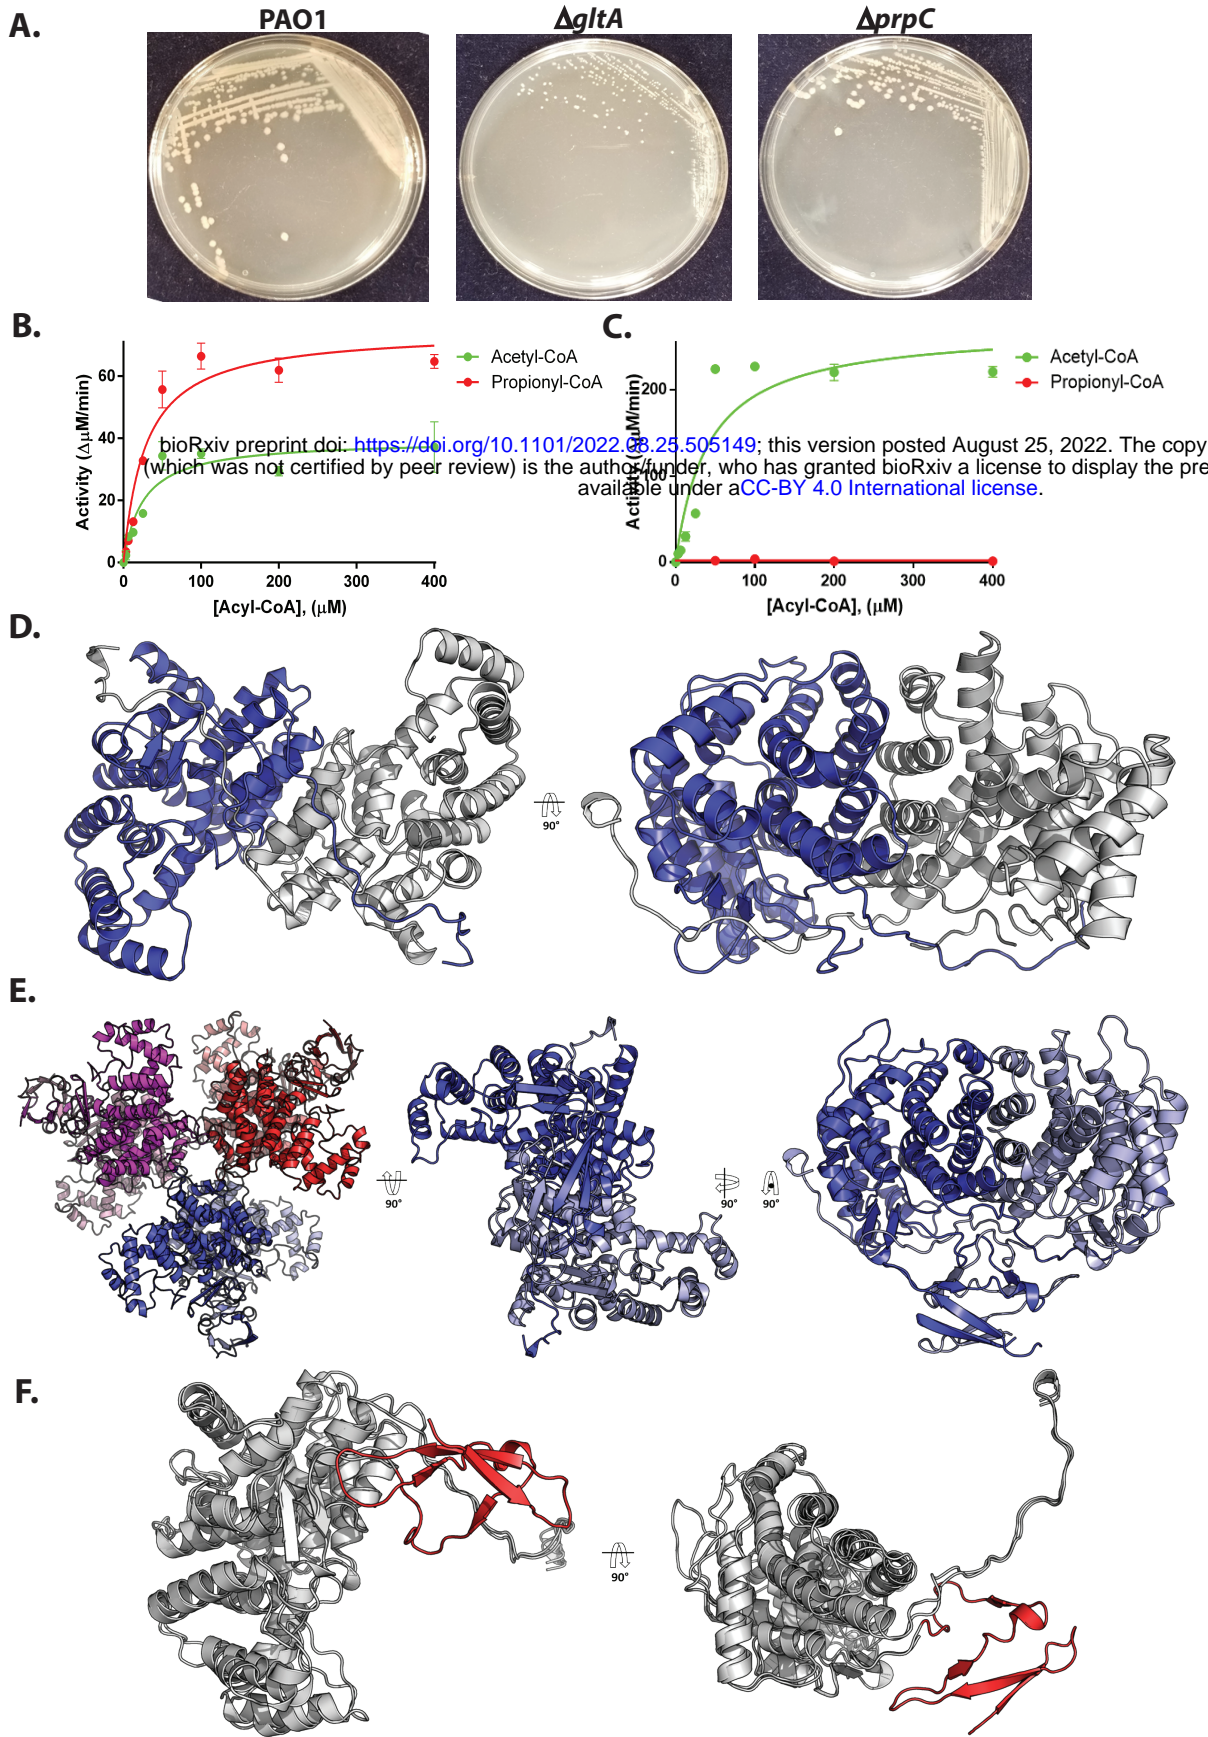

**Figure 4; Biochemical and structural analysis of PrpC and GltA from Pa.**

**A.** A  $\Delta$ *gltA* mutant exhibits a growth defect when cultured on LB-agar, whereas a  $\Delta$ *prpC* mutant displays a wild-type colony morphotype. The plates were photographed after 48 h. The data are representative of two independent experiments, each performed in triplicate.

**B.** Purified PrpC<sub>Pa</sub> exhibits both citrate synthase activity (with acetyl-CoA as a substrate) and 2-methylcitrate synthase activity (with propionyl-CoA as a substrate). The concentration of OAA in each reaction was fixed at 0.5 mM. The data are representative of two independent experiments, each performed in triplicate.

**C.** Purified GltA<sub>Pa</sub> is a citrate synthase with no detectable 2-methylcitrate synthase activity. The concentration of OAA was fixed at 0.5 mM. The data are representative of two independent experiments, each performed in triplicate.

**D.** The x-ray crystal structure of PrpC<sub>Pa</sub> (PDB: 6S6F). PrpC<sub>Pa</sub> is a homodimer. In the ribbon diagram shown, the protomers are coloured blue and grey.

**E.** Cartoon representation of the GltA<sub>Pa</sub> hexamer in the asymmetric unit (left) and, for comparison with PrpC<sub>Pa</sub>, the extracted GltA<sub>Pa</sub> dimers (middle and right).

**F.** Superposition of the PrpC<sub>Pa</sub> and GltA<sub>Pa</sub> structures. PrpC<sub>Pa</sub> and GltA<sub>Pa</sub> share similar core  $\alpha$ -helical folds (shown in grey to highlight similarities). However, GltA<sub>Pa</sub> has an additional antiparallel  $\beta$ -sheet at its N-terminus (coloured in red to showcase differences).



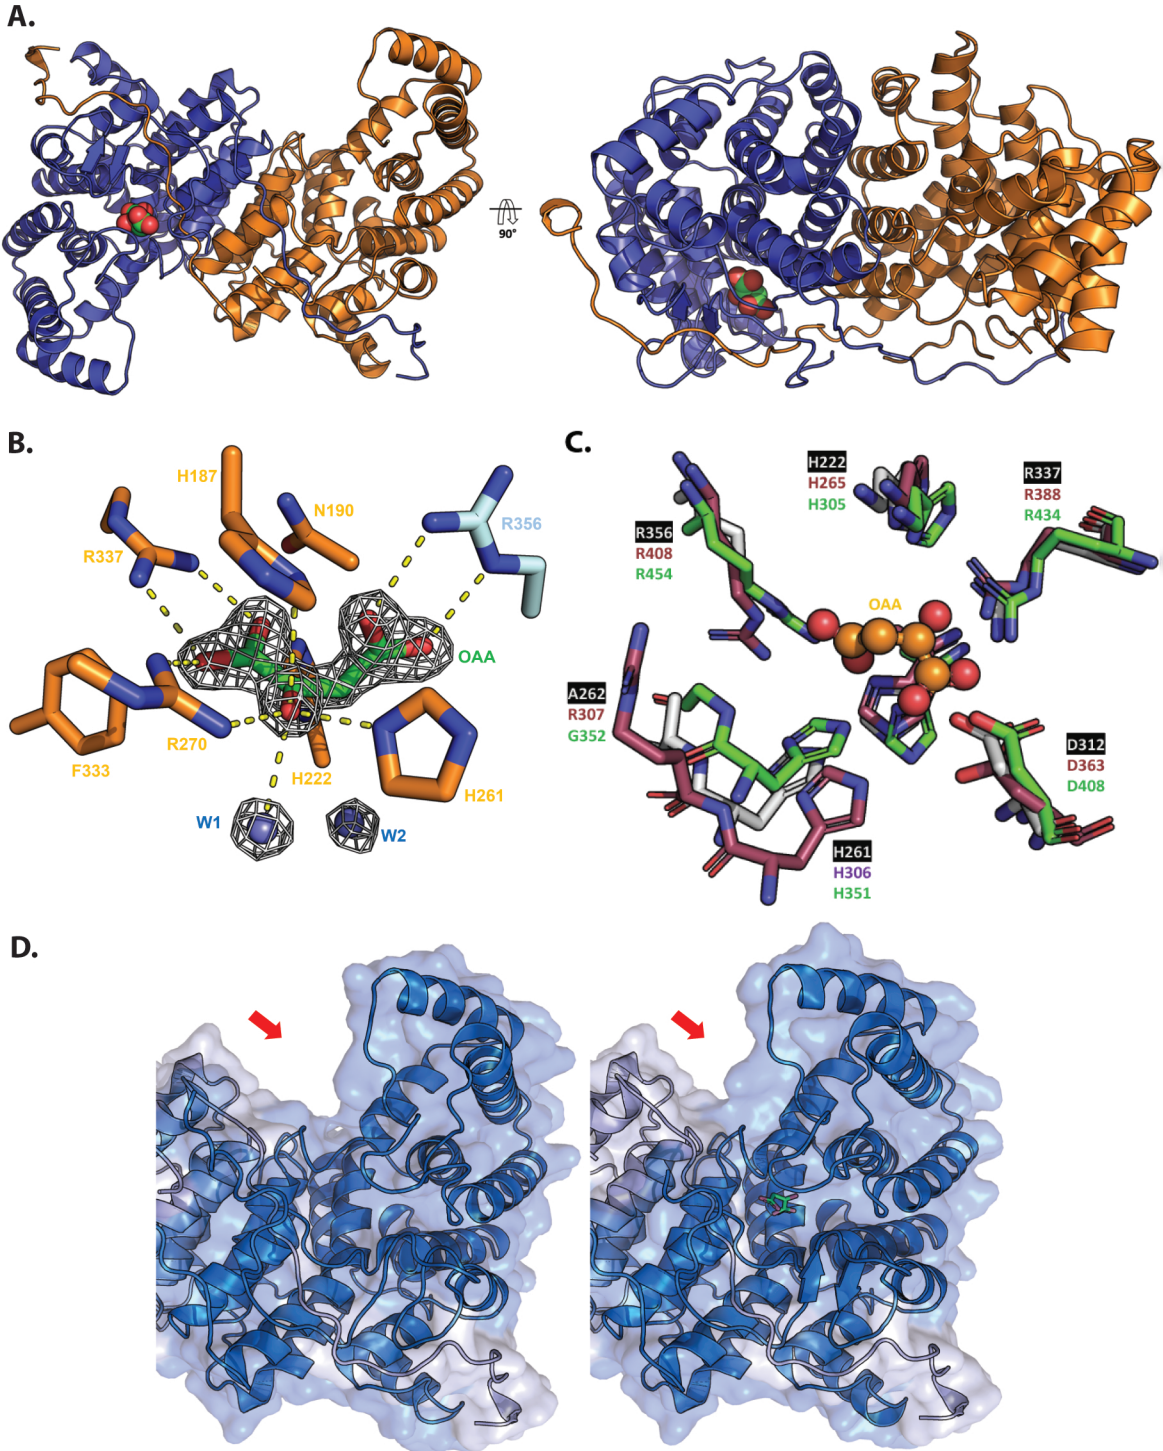

### Figure 5; Structural analysis of oxaloacetate-bound PrpCPa .

**A;** Crystal structure of oxaloacetate-bound PrpC<sub>Pa</sub> represented in cartoon (PDB: 6S87). One protomer is coloured blue and the other orange. A 90° rotation about the X-axis is shown (right). Oxaloacetate is shown as green and red spheres.

**B;** Oxaloacetate binding site from *P. aeruginosa* PrpC chain D. Water molecules are shown in cyan spheres. Chain D and chain C residues are shown in orange and cyan, respectively. The electron density map (2Fo-Fc) in white is contoured at 1.5σ.

**C;** Superposition of the PrpC<sub>Pa</sub> (white), GltA<sub>Pa</sub> (pink) and *A. fumigatus* PrpC (5UQR) (green) oxaloacetate binding site. Oxaloacetate is shown in orange spheres. Most of the amino acid residues forming this site are conserved, except R307 (GltA<sub>Pa</sub> numbering)

**D;** The left-hand panel shows the open (red) apo-conformation of PrpC<sub>Pa</sub>, the middle panel shows the partially closed (blue) holo-conformation of PrpC<sub>Pa</sub>, and the right hand panel shows a superposition of both conformations of PrpC<sub>Pa</sub>. Note the structural rearrangement in the oxaloacetate-bound PrpC<sub>Pa</sub> protomer (indicated by the red arrow).

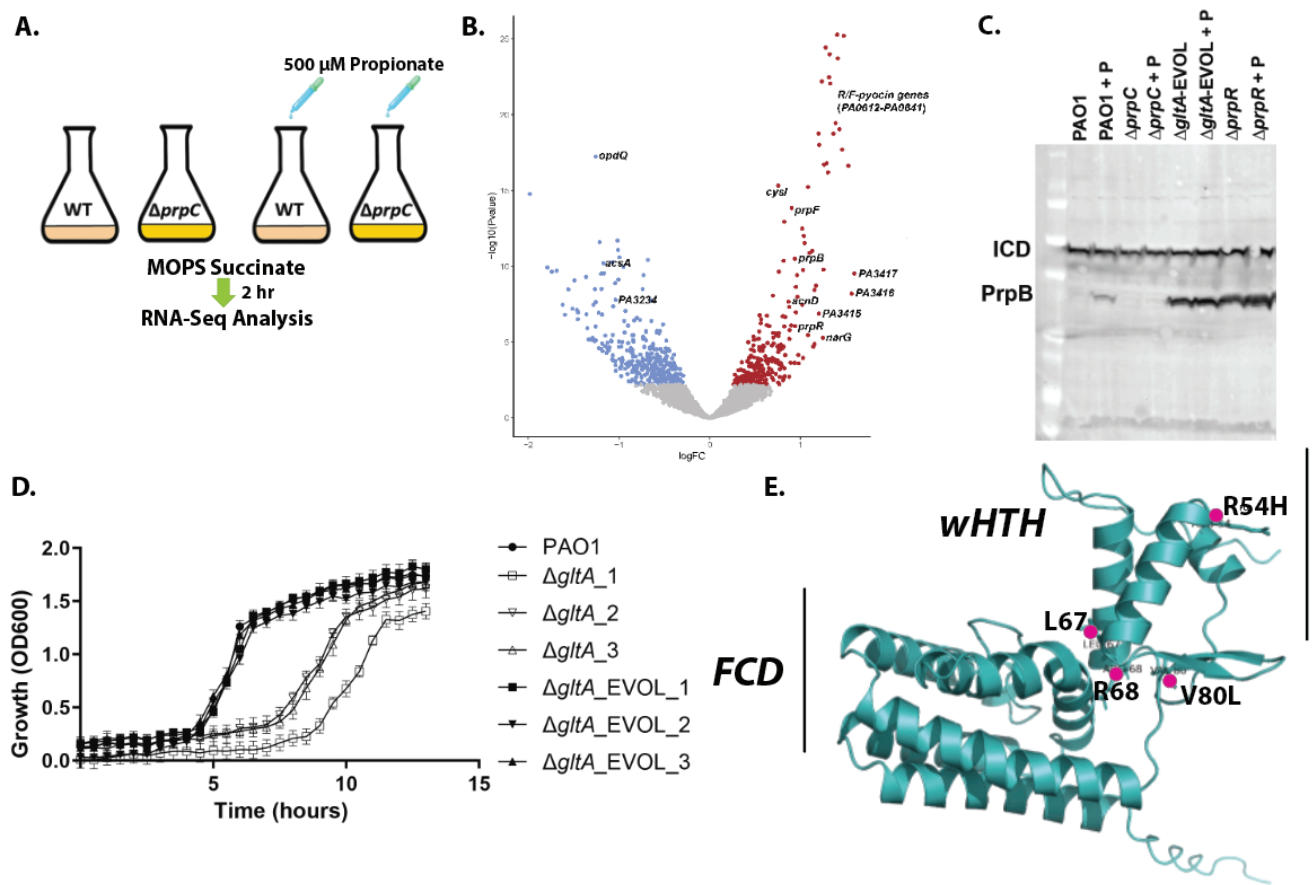

**Figure 6; RNA-seq analysis uncovers that propionate exposure induces expression of the *prp* operon and of the genes associated with branched chain amino acid catabolism in Pa.** **A;** Schematic of the experimental design. At OD 0.2, 500  $\mu$ M sodium propionate was spiked into (triplicate) cultures of PAO1 and the  $\Delta prpC$  mutant. An equal volume of H<sub>2</sub>O was added to the control PAO1 and  $\Delta prpC$  mutant cultures (also grown in triplicate). The cultures were harvested 2 h after the propionate addition, corresponding to an OD<sub>600</sub> of 0.6 (exponential growth) and RNA-seq analysis was carried out. **B;** The panel shows a volcano plot illustrating the log<sub>2</sub>-fold change in transcript abundance versus adjusted p-values for wild-type PAO1 grown in MOPS-succinate versus wild-type PAO1 grown in MOPS-succinate + 500  $\mu$ M propionate. Transcripts which are significantly ( $q$ -val < 0.05) increased (red) or decreased (blue) in abundance are indicated. Selected transcripts are labelled. **C;** Western blot showing protein expression levels of PrpB (32.1 kDa) in PAO1, and in the  $\Delta prpC$  mutant, the  $\Delta gltA\_EVOL$  mutant, and the  $\Delta prpR$  mutant after exposure to 4 mM propionate (+P) for 3 h. Isocitrate dehydrogenase (ICD – 45.6 kDa) served as loading control. Note that the  $\Delta gltA\_EVOL$  and  $\Delta prpR$  mutants display constitutively active PrpB expression, independent of propionate addition. Data representative of three independent experiments. **D;** Growth of  $\Delta gltA$  and  $\Delta gltA\_EVOL$ 1-3 mutants compared with PAO1 in MOPS-acetate medium. The data are representative of three independent experiments, each performed in triplicate. **E;** AlphaFold model of PrpR with the locations of the residues mutated and/or deleted in the  $\Delta gltA\_EVOL$ 1-3 mutants highlighted. The winged helix-turn-helix (wHTH) motif and the GntR family FadR C-terminal domain (FCD) are shown.
